# Supplementary material for: Energy cost of intracellular metal and metalloid detoxification in wild-type eukaryotic phytoplankton
Source: Royal Society of Chemistry journal article supplement (doi:10.1039/c6mt00049e), 2016-01-01
Supplement: c6mt00049e1.pdf [file c6mt00049e1.pdf]

1 **Supporting information for:**

2

3 **Energy cost of intracellular metal and metalloid detoxification in wild-type**

4 **eukaryotic phytoplankton**

5 Michel Lavoie<sup>1\*</sup>, John A. Raven<sup>2,3</sup>, Oliver A. H. Jones<sup>4</sup>, Haifeng Qian<sup>5</sup>

6

7 <sup>1</sup>Québec-Océan and Unité Mixte Internationale Takuvik UlaVal-CNRS, Département de  
8 Biologie, Université Laval, Québec, Québec, Canada G1K 7P4.

9 <sup>2</sup>Division of Plant Science, University of Dundee at the James Hutton Institute,  
10 Invergowrie, Dundee DD2 5DA, UK

11 <sup>3</sup>Functional Plant Biology and Climate Change Cluster (C3), University of Technology  
12 Sydney, Ultimo, NSW 2007, Australia

13 <sup>4</sup>Australian Centre for Research on Separation Science (ACROSS), School of Science,  
14 RMIT University, GPO Box 2476, Melbourne, VIC 3001, Australia

15 <sup>5</sup>College of Environment, Zhejiang University of Technology, Hangzhou 310032, P.R. of  
16 China

17

18 \*corresponding author

19 Email: Michel\_lavoie91@yahoo.ca

20

21

## Table of contents

22

|    |                                                                                                |    |
|----|------------------------------------------------------------------------------------------------|----|
| 23 | 1. Energy costs for biosynthesis of the amino acids that make up phytochelatins in algae.....  | 3  |
| 24 | 1.1 Energy cost of glutamate synthesis .....                                                   | 3  |
| 25 | 1.2 Energy cost of cysteine synthesis .....                                                    | 8  |
| 26 | 1.3 Energy cost of glycine synthesis .....                                                     | 12 |
| 27 | 2. Loss of peptides to the external medium and the energy cost of phytochelatin production ... | 13 |
| 28 | 3. Energy cost of Metal-PC complex transport in the vacuole and subsequent incorporation of    |    |
| 29 | sulfides.....                                                                                  | 14 |
| 30 | 4. Concentrations of phytochelatins in marine and freshwater phytoplankton exposed to Cd....   | 18 |
| 31 | 5. Polyphosphate production in phytoplankton and energetics of polyphosphate synthesis and     |    |
| 32 | degradation .....                                                                              | 20 |
| 33 | 6. Examples for some metals and algae species where no metal efflux was observed .....         | 23 |
| 34 | 7. Energy cost of As reduction and methylation.....                                            | 24 |
| 35 | 7.1 Biochemical pathway and energy cost of As reduction and methylation .....                  | 24 |
| 36 | 7.2 Experimental measurements of As accumulation in phytoplankton.....                         | 30 |
| 37 | 7.3 Calculating the energy cost of As biotransformation in relation to As accumulation .....   | 33 |
| 38 | 8. Hg reduction: Biochemical mechanisms, occurrence in algae and energy cost .....             | 36 |
| 39 | 8.1 Biochemical mechanism of Hg reduction and energy cost of Hg reduction .....                | 36 |
| 40 | 8.2 Measurements of Hg reduction in the literature and Hg reduction energy cost relative to    |    |
| 41 | energy for cell growth .....                                                                   | 37 |
| 42 | 9. Energetics of the ascorbate-glutathione cycle, glutathione peroxidase cycle and redox       |    |
| 43 | proteins .....                                                                                 | 39 |
| 44 | 10. Hydrophilic nonenzymatic antioxidant.....                                                  | 40 |
| 45 | 11. Lipophilic non-enzymatic antioxidants .....                                                | 46 |
| 46 | 12. References .....                                                                           | 48 |

47

48

49

50

51 **1. Energy costs for biosynthesis of the amino acids that make up phytochelatins in**

52 **algae**

53

54 **1.1 Energy cost of glutamate synthesis**

55

56 Glutamate is predominantly produced in plant chloroplasts via the GS/GOGAT  
57 (glutamine synthetase/glutamate 2-oxoglutarate aminotransferase) cycle<sup>1-3</sup>. This requires  
58 an N source ( $\text{NO}_3^-$  or  $\text{NH}_4^+$ ) and C assimilation into 2-oxoglutarate. Only a low fraction  
59 of glutamate is typically produced from the glutamate dehydrogenase pathway (GDH),  
60 that directly converts 1 mol 2-oxoglutarate to 1 mol glutamate using 1 mol NADH<sup>4-6</sup>,  
61 and the GDH that often catalyzes the reverse reaction leading to deamination of  
62 glutamate to 2-oxoglutarate in plants<sup>1,3</sup>.

63

64 In the GS/GOGAT cycle, 1 mol glutamate and 1 mol  $\text{NH}_4^+$  are first converted to  
65 glutamine by the enzyme glutamine synthetase (GS) using 1 mol ATP. In all  
66 photosynthetic eukaryotes and cyanobacteria the ferredoxin-dependent enzyme glutamate  
67 synthase (also frequently called the GOGAT enzyme) converts glutamine in 2 glutamate  
68 using 2-oxoglutarate and 2 reducing equivalents as reduced ferredoxin (equivalent to 1  
69 mol NAD(P)H). Glutamate can then re-enter the cycle or be used for biosynthesis. With  
70 an appropriate supply of 2-oxoglutarate and  $\text{NH}_4^+$  (either taken up from the medium or  
71 reduced from  $\text{NO}_3^-$ ), this cycle leads to the net synthesis of 1 mol glutamate<sup>3</sup>. The

72 biochemical pathways and energetics of N uptake and assimilation as well as of 2-  
73 oxoglutarate biosynthesis are described below.

74

75 The energy required for the uptake of exogenous inorganic nitrogen and reduction (if  
76 needed) to  $\text{NH}_4^+$ , which is used in the GS/GOGAT cycle, is as follows. If  $\text{NH}_4^+$  is the  
77 exogenous N source, 1 mol ATP is converted to 1 mol ADP for the uptake of 1 mol  $\text{NH}_4^+$   
78 coupled to 1 mol  $\text{H}^+$  efflux by the  $\text{H}^+$ -ATPase plasma membrane pump <sup>7</sup>. If  $\text{NO}_3^-$  is the  
79 exogenous N source however, 1 mol ATP is first required per mol  $\text{NO}_3^-$  taken up.  $\text{NO}_3^-$   
80 uptake occurs in algae as a secondary-active co-transport process in which  $\text{H}^+$  efflux by  
81 the  $\text{H}^+$ -ATPase maintains the negative electrical membrane potential and indirectly  
82 energizes  $\text{NO}_3^-:\text{H}^+$  or  $\text{NO}_3^-:\text{Na}^+$  co-transport <sup>8,9</sup>. Secondly, a total of 4 mol NAD(P)H (or  
83 their redox equivalent) are required for  $\text{NO}_3^-$  reduction to  $\text{NH}_4^+$ , i.e. 1 mol NAD(P)H for  
84 reduction of 1 mol  $\text{NO}_3^-$  and 6 reducing equivalents from reduced ferredoxin for the  $\text{NO}_2^-$   
85 to  $\text{NH}_4^+$  reaction are required, this is equivalent to 3 mol NAD(P)H <sup>9,10</sup>. Note that  $\text{NH}_4^+$   
86 can also be produced endogenously during the breakdown of storage proteins and the  
87 deamination of proteins and the catabolism of nucleic acids <sup>11</sup>, but breakdown and  
88 regeneration of proteins for cell maintenance cannot sustain the addition of nitrogen in  
89 newly synthesized metal-binding peptides when nitrogen of proteins is recycled.

90

91 The other substrate of the GS/GOGAT cycle is 2-oxoglutarate. This molecule is produced  
92 via a complex set of enzymatic reactions <sup>11</sup>. Briefly, the carbon fixed by the PCRC  
93 (Photosynthetic carbon reduction cycle or Benson-Calvin cycle) in the light is oxidized to  
94 pyruvate in the glycolysis pathway. Pyruvate is then converted to acetyl CoA, which is

95 used in the Krebs cycle to produce citrate, which is finally converted to 2-oxoglutarate by  
96 a sequence of two enzymatic reactions<sup>11</sup>. The synthesis of 1 mol citrate involves the  
97 reaction of 1 mol acetyl CoA with 1 mol oxaloacetate. The removal of 1 mol 2-  
98 oxoglutarate to produce 1 mol glutamate means that oxaloacetate is not regenerated by  
99 the subsequent Krebs cycle reactions consuming 2-oxoglutarate, and continued  
100 production of 2-oxoglutarate requires synthesis of oxaloacetate from photosynthate<sup>11</sup>. The  
101 energy cost of synthesis of 2 mol oxaloacetate is thus calculated below to account for the  
102 regeneration of this intermediate in the Krebs cycle as well as to its direct use in 2-  
103 oxoglutarate synthesis.

104

105 To produce the 5-C compound 2-oxoglutarate, 6 mol CO<sub>2</sub> must first be fixed to produce 2  
106 mol 3-phosphoglycerate by RuBisCO and then be reduced to form 2 mol glyceraldehyde-  
107 3-phosphate (G-3-P) in the PCRC in the light. Note that G-3-P can also be generated  
108 from stored polysaccharide and then glycolysis, in the dark, although at an extra energy  
109 cost related to synthesising and then mobilising the polysaccharide. The minimum  
110 absorbed photon cost per C assimilated into 1/3 mol G-3-P at CO<sub>2</sub> saturation is 9 and  
111 costs 2 mol NADPH and 3 mol ATP<sup>12</sup>. Thus, for synthesizing 2 mol G-3-P the minimum  
112 theoretical cost is **12 mol NADPH** and **18 mol ATP** and the absorbed photon cost is **54**.  
113 However, at present atmospheric CO<sub>2</sub> partial pressure or mol fraction (400 μmol CO<sub>2</sub>  
114 mol<sup>-1</sup> total gases) the minimum absorbed photon cost per mol C fixed into 1/3 mol G-3-P  
115 for the least costly mechanism based on diffusive CO<sub>2</sub> entry and PCOC (Photosynthetic  
116 carbon oxidation cycle or photorespiration) activity is 9.96 (see the Methods section of  
117 the main text body), while the various CCMs have absorbed photons costs per mol C of

118 9.5 – 11<sup>12,13</sup>. For 2 mol G-3-P the absorbed photon cost considering CCMs and PCOC  
119 operation is 57 – 66 mol (9.5 x 6 – 11 x 6), i.e. less than 22% higher than the minimum  
120 theoretical photon cost of 54.

121

122 1 mol G-3-P (out of the 2 mol produced by the PCRC, see previous paragraph) is  
123 exported to the cytosol by a triose-P translocator (TPT) or antiporter that exchanges one  
124 mol triose P for 1 mol inorganic phosphate at no ATP or NAD(P)H cost. This 1 mol G-3-  
125 P in the cytosol is then converted into 1 mol pyruvate through glycolysis generating 1  
126 mol NADH and 2 mol ATP. Pyruvate then enters the mitochondrion by a pyruvate  
127 transport protein mediating the electroneutral transport of pyruvate, which is driven by  
128 the differences in pH across mitochondrial membranes<sup>14</sup>. 1 mol Pyruvate is converted to  
129 1 mol acetyl CoA (with the production of 1 mol CO<sub>2</sub> and 1 mol NADH) that is combined  
130 with 1 mol oxaloacetate to produce 1 mol citrate. The citrate is then converted, via  
131 isocitrate, to 1 mol 2-oxoglutarate (with production of 1 mol CO<sub>2</sub> and 1 mol NADH).

132 Alternatively, pyruvate can be converted to citrate in the Krebs cycle in the  
133 mitochondrion, exiting via a DTC and then being converted in 2-oxoglutarate in the  
134 cytosol by aconitase and isocitrate dehydrogenase.

135

136 The other mol of G-3-P is converted to phosphoenolpyruvate (PEP) with production of 1  
137 mol NADH and 1 mol ATP; the PEP is then converted to oxaloacetate using PEP  
138 carboxylase with consumption of 1 CO<sub>2</sub> (as HCO<sub>3</sub><sup>-</sup>). This oxaloacetate regenerates the  
139 oxaloacetate used for 2-oxoglutarate synthesis (see previous paragraph). Oxaloacetate  
140 enters the mitochondrion, probably using an electroneutral dicarboxylate-tricarboxylate

141 carrier (DTC) where it is used in producing citrate and properly fueling the Krebs cycle  
142 <sup>15-17</sup>. Overall, 2 mol G-3-P are converted to 1 mol 2-oxoglutarate with net production of 1  
143 mol CO<sub>2</sub>, 4 mol NADH and 3 mol ATP.

144

145 Next, 2-oxoglutarate is pumped out of the mitochondrion through electroneutral  
146 dicarboxylate-tricarboxylate carriers (DTCs) that exchanges carboxylates at no ATP or  
147 NAD(P)H cost <sup>18</sup>. Finally, the 2-oxoglutarate is transferred from the cytosol to the  
148 chloroplast for the GS/GOGAT cycle using a 2-oxoglutarate/malate exchanger <sup>11</sup> at no  
149 ATP or NAD(P)H cost. Translocation of 2-oxoglutarate from the mitochondrion to the  
150 cytosol and the chloroplast does not change the energy cost (as NADH and ATP) of 2-  
151 oxoglutarate synthesis. Therefore, as stated above, 2 mol G-3-P are converted to 1 mol 2-  
152 oxoglutarate with net production of 1 mol CO<sub>2</sub>, 4 mol NADH and 3 mol ATP.

153

154 Given the above, using NH<sub>4</sub><sup>+</sup> as the N source synthesis of 1 mol glutamate from 2 mol G-  
155 3-P costs 2 mol ATP and 1 mol NAD(P)H (from the GS/GOGAT cycle and NH<sub>4</sub><sup>+</sup> uptake)  
156 but generates 4 mol NADH and 3 mol ATP, equivalent to the net production of 3 mol  
157 NAD(P)H and 1 mol ATP. Using NO<sub>3</sub><sup>-</sup> as the N source, synthesis of 1 mol glutamate  
158 from G-3-P costs 2 mol ATP and 5 mol NAD(P)H (from the GS/GOGAT cycle and NO<sub>3</sub><sup>-</sup>  
159 reduction, see above), but generates 4 mol NADH and 3 mol ATP, equivalent to a net  
160 cost of 1 mol NAD(P)H with production of 1 mol ATP. Including the cost of synthesis of  
161 2 mol G-3-P, i.e. 12 mol NAD(P)H and 18 mol ATP, the biosynthetic cost of 1 mol  
162 glutamate from N, CO<sub>2</sub>, photosynthetically active radiation (PAR) and water is **9 mol**

163 **NAD(P)H and 17 mol ATP if  $\text{NH}_4^+$  is the N source or 13 mol NAD(P)H and 17 mol**  
164 **ATP if  $\text{NO}_3^-$  is the N source.**

165

166 Conversion of these values to photon requirements uses the value of 9 absorbed mol  
167 photons to produce 2 mol NADPH and 3 mol ATP in non-cyclic electron flow, which is  
168 equivalent to 4.5 absorbed mol photons per 1 mol NAD(P)H and 1.5 mol ATP. In cyclic  
169 electron flow, 1 absorbed mol photon is required to produce 1 mol ATP<sup>12, 19</sup>. The  
170 synthesis of one mol glutamate from  $\text{CO}_2$ , PAR, water, and  $\text{NH}_4^+$  as the N source requires  
171 9 mol NAD(P)H, involving the coupled production of 13.5 mol ATP from non-cyclic  
172 electron flow, which is equivalent to  $(9 \times 4.5)$  40.5 mol absorbed photons. Since 17 mol  
173 ATP are required to synthesise 1 mol glutamate with  $\text{NH}_4^+$  as N source, the additional  
174  $(17-13.5)$  3.5 mol ATP using cyclic electron flow costs 3.5 mol absorbed photons, i.e a  
175 total of  $(40.5+3.5)$  or **44 mol absorbed photons**. If  $\text{NO}_3^-$  is the N source, production of  
176 the 13 mol NAD(P)H and the coupled 19.5 mol ATP requires  $(13 \times 4.5)$  58.5 mol  
177 absorbed photons. The 19.5 mol ATP synthesised in non-cyclic electron transport is 2.5  
178 mol ATP more than is needed in glutamate synthesis; the use of this 2.5 mol ATP in other  
179 essential processes spares the use of 2.5 mol absorbed photons, so the net photon  
180 requirement is  $(58.5-2.5)$  or **56 mol absorbed photons**.

181

## 182 **1.2 Energy cost of cysteine synthesis**

183

184 The biosynthesis of cysteine requires  $\text{SO}_4^{2-}$ ,  $\text{CO}_2$ , PAR,  $\text{H}_2\text{O}$  and a N source ( $\text{NO}_3^-$  or  
185  $\text{NH}_4^+$ ). We start by considering the energetics of  $\text{SO}_4^{2-}$  uptake and reduction. Sulphate



186 uptake in plants across the plasmalemma uses ~1 mol ATP per mol  $\text{SO}_4^{2-}$  for a  
187  $3\text{H}^+ : 1\text{SO}_4^{2-}$  symport <sup>20</sup>. Sulfate reduction to sulfide ( $\text{S}^{2-}$ ) consumes  $732 \text{ kJ mol}^{-1}$ , or 1 mol  
188 ATP, 6 electrons (usually from reduced ferredoxin, equivalent to 3 mol NAD(P)H) and 2  
189 other electrons of GSH (equivalent to 1 mol NAD(P)H) <sup>21</sup>. Sulfate is first activated by  
190 ATP-sulfurylase in the presence of 1 mol ATP to form adenosine 5'-phosphosulphate  
191 (APS). One mol APS is then converted to 1 mol S-sulfogluthathione and 1 mol AMP by  
192 the enzyme APS sulfotransferase coupled to the oxidation of 1 mol GSH in GSSG and  
193 AMP plus P<sub>i</sub>, equivalent to converting 2 mol ATP to ADP. Reduction of APS to  $\text{SO}_3^{2-}$   
194 and AMP using 2 GSH converted to 1 GSSG; 1 NADPH is converted to  $\text{NADP}^+$  re-  
195 reducing the GSSG back to 2 GSH <sup>20, 21</sup>. One mol  $\text{SO}_3^{2-}$  is reduced to 1 mol  $\text{S}^{2-}$  using 6  
196 mol of reducing equivalents as reduced ferredoxin; this is equivalent to converting 3 mol  
197 NADPH to 3 mol  $\text{NADP}^+$ . The  $\text{S}^{2-}$  then converts *serine* (see next paragraphs for details  
198 on the biochemical pathways leading to serine synthesis and on the energetics of serine  
199 synthesis) to cysteine using serine acetyl transferase and O-acetylserine thiol lyase (also  
200 called cysteine synthase). The use of acetyl CoA as a substrate and the production of CoA  
201 and acetate involve the conversion of 2 mol ATP to ADP and 2P<sub>i</sub> in regeneration of 1  
202 mol of the acetyl CoA by acetyl CoA synthetase. The energy required for the reduction of  
203 1 mol  $\text{SO}_4^{2-}$  into  $\text{S}^{2-}$  and the production of 1 mol cysteine from serine and  $\text{S}^{2-}$  is 8 mol  
204 NAD(P)H and 7 mol ATP.

205

206 The serine, which is required as a substrate of the reactions leading to cysteine synthesis,  
207 is produced via  $\text{CO}_2$  fixation and assimilation in G-3-P by the PCRC followed by  
208 enzymatic conversion of G-3-P in serine. Although the PCOC cycle could synthesize

209 serine, this cycle only functions in the light and with fluxes restricted due to the usual  
210 presence of a CCM in algae as explained in the section about glutamate synthesis. One  
211 mol of G-3-P can be first produced by the PCRC at a cost of 6 mol NADPH and 9 mol  
212 ATP (or 27 mol absorbed photons).

213

214 Afterwards, 1 mol G-3-P is converted to 1 mol serine using the following biochemical  
215 pathways. Conversion of 1 mol G-3-P to 1 mol 3-phosphoglycerate, via 1 mol glycerate-  
216 1,3-bisphosphate, converts 1 mol NAD(P)<sup>+</sup> to 1 mol NAD(P)H, and 1 mol ADP to 1 mol  
217 ATP. Oxidation of 1 mol 3-phosphoglycerate to 3-phosphohydroxypyruvate involves  
218 reduction of 1 mol NAD(P)<sup>+</sup> to 1 mol NAD(P)H. Amination of 2.5 mol (3-  
219 phospho)hydroxypyruvate to produce 1 mol 3-phosphoserine, using the GS/GOGAT  
220 pathway, consumes 1 mol NH<sub>4</sub><sup>+</sup>, and converts 1 mol ATP to 1 ADP and 1 mol NADH to  
221 1 mol NAD<sup>+</sup>. If NH<sub>4</sub><sup>+</sup> is the exogenous N source, 1 mol ATP is converted to 1 mol ADP  
222 for the uptake of 1 mol NH<sub>4</sub><sup>+</sup> and the efflux of 1 mol H<sup>+</sup>, while if NO<sub>3</sub><sup>-</sup> is the exogenous  
223 N source, 1 mol ATP is converted to 1 mol ADP for the uptake of 1 mol NO<sub>3</sub><sup>-</sup> and 4 mol  
224 NAD(P)H are converted to 4 mol NAD(P)<sup>+</sup> in reducing 1 mol NO<sub>3</sub><sup>-</sup> to 1 mol NH<sub>4</sub><sup>+</sup> (see  
225 previous section on glutamate synthesis for further details on NO<sub>3</sub><sup>-</sup> reduction). For the  
226 conversion of 1 mol G-3-P into 1 mol serine, the balance of reduction-oxidation  
227 (NAD(P)H-NAD(P)<sup>+</sup>) and dehydration-hydration (ATP + H<sub>2</sub>O - ADP + Pi) for **NH<sub>4</sub><sup>+</sup> as**  
228 **N source is a production of 1 mol NAD(P)H and consumption of 1 mol ATP**, while  
229 **for NO<sub>3</sub><sup>-</sup> as N source is a consumption of 3 mol NAD(P)H and of 1 mol ATP.**

230

231 The net energy cost for the synthesis of 1 mol serine from CO<sub>2</sub>, PAR and N is 5 mol  
232 NAD(P)H and 10 mol ATP using NH<sub>4</sub><sup>+</sup> as the N source or 9 mol NAD(P)H and 10 mol  
233 ATP using NO<sub>3</sub><sup>-</sup> as the N source, while the energy required for sulfate reduction and the  
234 production of 1 mol cysteine from S<sup>2-</sup> and serine is 8 mol NAD(P)H and 7 mol ATP.  
235 Finally, the total energy cost for the synthesis of one cysteine from CO<sub>2</sub>, PAR, N, and  
236 SO<sub>4</sub><sup>2-</sup> is **13 mol NAD(P)H** and **17 mol ATP** if NH<sub>4</sub><sup>+</sup> is the N source or **17 mol NAD(P)H**  
237 and **17 mol ATP** if NO<sub>3</sub><sup>-</sup> is the N source.

238

239 Conversion of these values to photon requirements uses the values of **9** absorbed mol  
240 photons to produce 2 mol NADPH and 3 mol ATP in non-cyclic electron flow, which is  
241 equivalent to 4.5 absorbed mol photons per 1 mol NADPH and 1.5 mol ATP. In cyclic  
242 electron flow, 1 absorbed mol photon is required to produce 1 mol ATP<sup>12, 19</sup>. For the  
243 synthesis of 1 mol cysteine with NH<sub>4</sub><sup>+</sup> as the N source, production of 8 mol NADPH and  
244 12 (8 x 1.5) mol ATP from non-cyclic electron flow requires 36 (8 x 4.5) mol absorbed  
245 photons. The remaining 3 mol ATPs can be produced by cyclic electron flow using 3 mol  
246 absorbed photons. For the synthesis of 1 mol cysteine with NO<sub>3</sub><sup>-</sup> as the N source,  
247 production of 13 mol NADPH and the coupled 19.5 mol ATP (13 x 1.5) from non-cyclic  
248 electron flow requires (13 x 4.5) 58.5 mol absorbed photons. Production of the 4.5 mol  
249 ATP in excess of that required for cysteine synthesis costs 4.5 mol absorbed photons by  
250 cyclic electron flow. The total energy cost for the synthesis of 1 mol cysteine is **39 and**  
251 **54 mol absorbed photons if NH<sub>4</sub><sup>+</sup> and NO<sub>3</sub><sup>-</sup>** are the N source respectively. The photon  
252 energy cost for the synthesis of one γ-EC unit is **83** (44 + 39) or **110** (56 + 54) mol  
253 absorbed photons if NH<sub>4</sub><sup>+</sup> and NO<sub>3</sub><sup>-</sup> is the N source, respectively.

254

### 255 **1.3 Energy cost of glycine synthesis**

256

257 Glycine can be produced by the glycolate cycle (PCOC or photorespiration or  
258 photorespiratory carbon oxidation cycle), but the PCOC only functions in the light and  
259 with fluxes restricted due to the usual presence of a CCM in algae as explained above.  
260 Therefore, glycine is expected to come from the PCRC products and glycolytic pathway  
261 intermediate, G-3-P. As detailed above, the PCRC and glycolysis produce serine. Serine  
262 and tetrahydrofolate (THF) are then converted in glycine and 5,10-  
263 methylenetetrahydrofolate (5, 10-CH<sub>2</sub>-THF) by the enzyme serine hydroxymethylase <sup>22</sup>.  
264 5,10-CH<sub>2</sub>-MTHF can be subsequently reduced to 5-methyltetrahydrofolate (5-CH<sub>3</sub>-THF)  
265 by a 5,10-methylenetetrahydrofolate reductase enzyme that is NADH dependent in  
266 plants, not NADPH-dependent as in other eukaryotes <sup>23</sup>. Finally, THF is recycled with  
267 methionine synthase using 5-CH<sub>3</sub>-THF and homocysteine as substrates with no ATP or  
268 NAD(P)H inputs <sup>24</sup>. Taking the energy cost of serine biosynthesis calculated in the  
269 previous section, the biosynthesis of 1 mol glycine from CO<sub>2</sub>, PAR, and N requires 6 mol  
270 NAD(P)H and 10 mol ATP if NH<sub>4</sub><sup>+</sup> is the N source or 10 mol NAD(P)H and 10 mol ATP  
271 if NO<sub>3</sub><sup>-</sup> is the N source.

272

273 If NH<sub>4</sub><sup>+</sup> is used as an N source for the synthesis of 1 mol glycine, the production of 6 mol  
274 NADPH by non-cyclic electron flow and the associated 9 mol ATP requires 27 mol  
275 absorbed photons. 1 mol ATP can also be produced via cyclic-electron flow at a cost of 1  
276 mol absorbed photons. If NO<sub>3</sub><sup>-</sup> is used as an N source for the synthesis of 1 mol glycine,

277 the production of 10 mol NADPH by non-cyclic electron flow and the associated 15 mol  
278 ATP requires 45 mol absorbed photons. The 5 mol ATP in excess would cost 5 mol  
279 absorbed photons, which needs to be subtracted of the 45 mol absorbed photons. The  
280 total energy cost for the synthesis of 1 mol glycine from CO<sub>2</sub>, N, PAR and water is **28**  
281 **and 41 mol absorbed photons** if NH<sub>4</sub><sup>+</sup> and NO<sub>3</sub><sup>-</sup> are the N source respectively.  
282 Therefore, the energy cost for the synthesis of 1 mol GSH is **97** (30 + 39 +28) or **125** (30  
283 + 54 + 41) mol absorbed photons if NH<sub>4</sub><sup>+</sup> and NO<sub>3</sub><sup>-</sup> is the N source, respectively.

284

## 285 **2. Loss of peptides to the external medium and the energy cost of phytochelatin** 286 **production**

287

288 Loss of GSH, amino acids and PCs in the external medium is not accounted for in the  
289 total energy cost of PC synthesis for the following reasons. Even though an appreciable  
290 fraction of the total intracellular GSH in *Thalassiosira weissflogii* exposed to highly  
291 inhibitory Cu ( $\mu$  of around 0.2 d<sup>-1</sup>) may be lost into the culture medium each day  
292 probably because of Cu-induced cell breakage, the GSH loss rate in *T. weissflogii* is  
293 normally low (<10% of GSH cell quotas) at slightly toxic Cu concentration <sup>25</sup>. Similarly,  
294 exudation of GSH and cysteine in *E. huxleyi* only slightly increased in response to  
295 slightly toxic Cu, Cd or Zn concentrations and the amount lost each day likely remains a  
296 small fraction (<10%) of the total intracellular thiols <sup>26</sup>. Our calculation of the  
297 biosynthetic cost of PC also neglects active efflux of Me-PC complexes through a  
298 putative ABC membrane transporter. The occurrence of such an efflux of Cd-PC  
299 complexes has been strongly suggested in the marine diatom *T. weissflogii* <sup>27</sup>. Although  
300 this efflux system allow the fast efflux of Cd taken up (two ions are released in the

301 culture medium for each 4 Cd ion taken up), the efflux of phytochelatin (as Cd-PC  
302 complexes) accounted for around 10% of total steady-state intracellular phytochelatin  
303 produced each day by the alga <sup>27</sup>.

304

305 **3. Energy cost of Metal-PC complex transport in the vacuole and subsequent**  
306 **incorporation of sulfides**

307

308 Metal-phytochelatin (and Metal-GSH) complexes (often called low molecular weight, or  
309 LMW, complexes) once formed in the cytosol can be transported into the vacuoles of  
310 fungi and plants by specific ATP-dependent transporters requiring 1 mol ATP per mol  
311 Metal-PC complex transported in the vacuole <sup>28</sup>. Although the specific transporters of  
312 Metal-PC complexes are yet to be studied in algae, accumulation of Cd-PC complexes in  
313 the vacuole of *Duniallella bioculata* exposed to Cd has been observed by X-ray  
314 microscopy <sup>29</sup> and co-sequestration of Cd, N and S sulfur compounds has also been  
315 observed in the vacuole of *Skeletonema costatum* exposed to Cd and Cu <sup>30</sup>. In plants,  
316 yeasts and algae, sulfide (S<sup>2-</sup>) is incorporated in some Cd-PC (or Cd-GSH) complexes  
317 forming a Cd sulfide crystalline core coated with PC. Such complexes called HMW Cd-  
318 PC complexes exhibit a high molecular weight (10 000 Da), are more stable and have a  
319 higher Cd binding capacity than LMW Cd-PC complexes. Whether or not HMW  
320 complexes are formed with other metal ions than Cd remains to be demonstrated <sup>28</sup>. In  
321 LMW Cd-PC complexes, the Cys:Cd ratios (or SH:Cd) are often around 2:1 and 4:1 in  
322 yeast and algae <sup>31-34</sup>, but can reach values near 0.6:1 in HMW Cd-PC complexes in *P.*  
323 *tricornutum* <sup>32</sup>. Although synthesis of the LMW Cd-PC complexes are rapid occurring on  
324 a time scales of minutes <sup>35</sup>, detectable conversion of LMW Cd-PC complexes into HMW

325 Cd-PC complexes in *P. tricornutum* and *C. reinhardtii* is slower and typically occurs  
326 after days of exposure. The HMW complexes dominate over the LMW-complexes after  
327 several days of Cd exposure, only when the cells grown in batch cultures are probably in  
328 the stationary growth phase<sup>32, 36</sup>. The S<sup>2-</sup>:Cd ratio of the HMW Cd-PC complexes has  
329 been shown to be 0.4 in *P. tricornutum*<sup>32</sup> and 0.22 in *C. reinhardtii*<sup>36</sup>.

330

331 The source of the sulfide and the biosynthetic pathway of HMW complexes are unknown  
332 in algae and not fully known in yeast. In yeast, the limited scientific evidence available so  
333 far suggests that cysteine provides the sulfide of the HMW complexes according to the  
334 following reactions. First, cysteine sulfinate (CS) is derived from cysteine by cysteine  
335 dioxygenase. Second, CS is incorporated into either  
336 sulfinylpropanylaminoimidazoecarboxamide ribonucleotide (SPACR) or sulfinyl  
337 propanyl adenylate (SPA) by succinoaminoimidazolecarboxamide ribonucleotide  
338 synthetase (SAICAR synthetase) or adenylosuccinate synthetase (AMP-S synthetase)  
339 respectively. Both reaction requires the equivalent of 1 mol ATP since the SAICAR  
340 synthetase enzyme converts 1 ATP in 1 ADP and the AMP-S synthetase enzyme converts  
341 1 GTP in 1 GDP<sup>37, 38</sup>. Third, both S analogs (SPACR and SPA) are presumably either  
342 donors or carriers of S<sup>2-</sup> to Cd-GSH or PC-Cd complexes to form HMW GSH-CdS and  
343 PC-CdS complexes in the vacuole of algae and yeast<sup>28, 32</sup>. Note that either the GSH-Cd  
344 complex is transported in the vacuole and then converted in PC-Cd complexes with a  
345 vacuolar PCS or the PC-Cd complexes are directly transported in the vacuole; both  
346 translocations from the cytosol to the vacuole by a putative algal ABC transporters could  
347 cost ~1 ATP as previously observed in yeast<sup>28, 39</sup>. Note also that additional Cd<sup>2+</sup> ions

348 could also be transported directly in the vacuole by specific transporters of  $\text{Cd}^{2+}$  ions in  
349 the tonoplast and contribute to the formation of HMW Cd-PC complex as proposed in  
350 yeast<sup>39</sup>. In yeast,  $\text{Cd}^{2+}$  ion can be translocated from the cytosol to the vacuole by specific  
351  $\text{Cd}^{2+}$  transporters using the proton gradient of vacuolar membrane and thus  $\text{Cd}^{2+}:2\text{H}^+$   
352 antiport. This  $\text{H}^+$  gradient is built by a  $\text{H}^+$ -ATPase located in plant and yeast tonoplast  
353 and 2 ATP are thus necessary to maintain the proton gradient for each  $\text{Cd}^{2+}$  ions  
354 accumulated in the vacuole<sup>39</sup>. The stoichiometry of this reaction is however unknown in  
355 any organism, to our knowledge, and was not considered in our calculation of the energy  
356 cost of PC synthesis. Since the energy required for  $\text{Cd}^{2+}$  transport in the vacuole is a low  
357 fraction of the total energy cost of PC biosynthesis, this particular reaction could be  
358 neglected.

359

360 Overall, biosynthesis of HMW Cd-PC complexes costs 2 ATP per transfer of  $\text{S}^{2-}$  from  
361 cysteine to LMW Cd-PC complexes, while the production cost of 1 mol  $\text{S}^{2-}$  is 1 mol ATP  
362 and 4 mol NAD(P)H. Therefore, for the HMW Cd-PC complexes studied in *P.*  
363 *tricornutum*<sup>32</sup> with a SH: Cd ratio of 0.6:1 and a  $\text{S}^{2-}$ : Cd ratio of 0.4:1, which is equivalent  
364 to a SH:  $\text{S}^{2-}$  ratio of 1.5 or a  $\text{S}^{2-}$ : SH ratio of 2/3, then the approximate cost of  $\text{S}^{2-}$  synthesis  
365 and incorporation in the HMW Cd-PC complex per SH of PCs is  $2/3 \times [3 \text{ ATP} + 4$   
366  $\text{NAD(P)H}]$ , or 2 mol ATP and  $8/3$  mol NAD(P)H. The synthesis of  $8/3$  mol NADPH and  
367 the coupled 4 mol ATP by non-cyclic electron transport costs 12 mol absorbed photons.  
368 Subtracting the photon cost of the 2 mol ATP in excess (2 mol absorbed photons by  
369 cyclic electron transport), then the biosynthetic cost of  $\text{S}^{2-}$  and its incorporation in the  
370 HMW Cd-PC complex per 1 mol SH of PCs is 10 mol absorbed photons. This cost is low



371 compared to the photon energy cost of the synthesis of 1 mol PCs in LMW Cd-PC  
372 complex, i.e. either  $28 + 83n + 4n$  ( $\text{NH}_4^+$  as the N source) or  $41 + 110n + 4n$  ( $\text{NO}_3^-$  as N  
373 source) mol absorbed photons (where n is expressed as mol SH groups per mol PCn) (see  
374 main text body).  
375

376

377 **4. Concentrations of phytochelatins in marine and freshwater phytoplankton**

378 **exposed to Cd**

379

380 Here we report intracellular phytochelatin concentrations measured in various marine and  
381 freshwater phytoplankton species exposed to Cd, the more potent inducer of  
382 phytochelatin<sup>28, 40, 41</sup>. We consider PCs production in marine phytoplankton and then  
383 freshwater phytoplankton.

384

385 Rijstenbil and Wijnholds<sup>42</sup> show that total cellular phytochelatin concentrations in four  
386 marine phytoplankton species (*Ditylum brightwellii*, *Phaeodactylum tricornutum*,  
387 *Skeletonema costatum*, and *Thalassiosira pseudonana*) reached up to 1.5 mmol SH of  
388 PCs per  $L_{\text{cell}}$  after a 24 h-exposure to total Cu or Cd concentrations in the  $\mu\text{M}$  range,  
389 which significantly decreased cell viability. The marine coccolithophore *E. huxleyi* was  
390 the species synthesizing the highest PC concentration at the highest tested Cd  
391 concentration among 8 marine phytoplankton species examined by Ahner et al.<sup>34</sup>. At 1  
392 nM free  $\text{Cd}^{2+}$ , a high concentration for marine environments but a Cd concentration  
393 around 4 times lower than the Cd toxicity threshold on the growth of *E. huxleyi* CCMP  
394 374<sup>43</sup>, *E. huxleyi* synthesize around 16 mmol SH of PCn (around 160 amol of  $\text{PC}_2$  and  
395  $\text{PC}_3$  and assuming a cell volume of  $50 \mu\text{m}^3$  as measured in control cells). Note, however,  
396 that the computation of intracellular PC concentration in *E. huxleyi* using the cell volume  
397 of control cell could lead to over-estimation of intracellular PC concentrations since Cd is

398 known to induce enlargement of algal cell size even at non-growth inhibitory  
399 concentrations.  
400  
401 The freshwater alga *C. reinhardtii* exposed for 72 h to 200 nM Cd<sup>2+</sup> (around EC50 on  
402 cell yield) synthesizes around 300 amol  $\gamma$ -GC unit (PC<sub>2</sub> to PC<sub>6</sub>) per cell. If the biovolume  
403 is around 65  $\mu\text{m}^3$  (control cells) but around 520  $\mu\text{m}^3$  for Cd-intoxicated cells, then the  
404 PCs concentration will be around 570  $\mu\text{mol}$  EC units of PC per  $L_{\text{cell}}$  in Cd-exposed cells  
405 <sup>33</sup>. By comparison, the freshwater alga *Scenedesmus vacuolatus* exposed to the highest  
406 Cd<sup>2+</sup> concentration tested by Le Faucheur et al. <sup>44</sup>, i.e. 79 nM Cd<sup>2+</sup> (a concentration  
407 inhibiting cell growth rate), synthesized around 200 amol SH of PCs per cell (mostly PC<sub>2</sub>  
408 and PC<sub>3</sub>). Taking the cell volume of control cells (117  $\mu\text{m}^3$ ), which was similar to the cell  
409 volume measured in cells exposed to 79 nM Cd<sup>2+</sup>, *S. vacuolatus* synthesized up to 1.7  
410 mmol SH of PC per  $L_{\text{cell}}$ .  
411  
412 A wild-type strain of the freshwater alga *Chlorella* sp. exposed for 4 days to 10  $\mu\text{M}$  total  
413 Cd (a concentration that strongly inhibits the growth rate by 70% relative to that of the  
414 control) has been shown to synthesize 0.082 mmol PC (as GSH equivalent) per gram  
415 fresh weight <sup>45</sup>. Assuming a wet weight:carbon mass ratio of 10 <sup>46</sup>, PC cell content is  
416 equivalent to 8.2  $\mu\text{mol}$  PC (as SH) per g carbon or 98.4  $\mu\text{mol}$  PC per mol carbon.  
417 Assuming an organic carbon cell concentration of 23.23 mol C  $L_{\text{cell}}^{-1}$  in freshwater algal  
418 cells (see method section of the main text body), the intracellular PC concentration in that  
419 wild-type strain of *Chlorella* is around 2.29 mmol SH of PCs per  $L_{\text{cell}}$ . The study of  
420 Kaplan et al. <sup>45</sup> also looked at the level of PCs synthesis in a resistant strain of *Chlorella*

421 sp. (CdR-DK) isolated from an urban waste water treatment plant. This strain  
422 constitutively synthesizes large amount of PCs, i.e. 2.165 mmol PC (as SH) per g fresh  
423 weight, which is equivalent to 60.4 mmol PC (as SH) per  $L_{\text{cell}}$  using the same  
424 assumptions as above. After 4 days of exposure to 100  $\mu\text{M}$  total Cd (a Cd concentration  
425 inhibiting the growth rate by around 70%), the resistant strain of *Chlorella* sp.  
426 synthesizes 3.77 mmol PC (as SH) per g fresh weight or 105.2 mmol PC (as SH) per  $L_{\text{cell}}$ .  
427 A Cr-tolerant and a wild-type strain of the freshwater green alga *Scenedesmus acutus*  
428 have been shown to accumulate up to around 8  $\mu\text{mol}$  SH-PC per g dry weight after a 24 h  
429 exposure to total Cd concentrations of 2.25 to 4.5  $\mu\text{M}$  (4.5  $\mu\text{M}$  total Cd totally suppressed  
430 algal growth for the first 24 h)<sup>47</sup>. Using a dry weight per cell biovolume of 498.5 g dry  
431 weight per liter determined in *Scenedesmus quadricauda*<sup>48</sup>, a strain closely related to *S.*  
432 *acutus*, *S. acutus* synthesize an approximate PCs concentration of 3.9 mmol PC-SH per  
433  $L_{\text{cell}}$ .

434

## 435 **5. Polyphosphate production in phytoplankton and energetics of polyphosphate** 436 **synthesis and degradation**

437

438 Polyphosphate (PolyP) concentrations in P-replete marine and freshwater phytoplankton  
439 cells usually represent a minor fraction of cell phosphorus ( $\leq 10\%$  of total cellular P)<sup>49-52</sup>.  
440 However, some algae such as the halotolerant algae *Dunaliella salina* can store large  
441 amount of PolyP of the order of 0.5 to 1 mol  $L_{\text{cell}}^{-1}$  so that cell phosphorus is mostly  
442 present as PolyP<sup>53</sup>. The pavlovophyeen (Haptophyta) *Pavlova lutheri* also stored large  
443 amount of PolyP (up to 70% of total cell phosphorus) when grown in the presence of

444 sufficient phosphate concentrations for growth <sup>50</sup>. *Chlorella ellipsoidea* is another  
445 example of microalgae containing more than 10% of cell phosphorus in PolyP. Indeed,  
446 fractionation of intracellular P in this species performed by Miyachi and Tamiya <sup>54</sup> has  
447 shown that PolyP constitutes around 31% of total cell P.

448

449 Polyphosphate can be synthesized via the two biochemical reactions and associated  
450 enzymes:

451

452 1) Polyphosphate kinase, which catalyzes the formation of orthophosphate chains  
453 from ATP by this reaction:  $ATP + (\text{phosphate})_n \rightleftharpoons ADP + (\text{phosphate})_{n+1}$  ;

454 2) 3-phospho-glyceroyl-phosphate-polyphosphate phosphotransferase or  
455 bisphosphoglycerate-polyphosphate phosphotransferase, which catalyzes the  
456 reaction:  $1,3\text{-bisphosphoglycerate} + (\text{phosphate})_n \rightleftharpoons 3\text{-phosphoglycerate} +$   
457  $(\text{phosphate})_{n+1}$

458

459 In the first and the second reaction, the phosphorylation of the growing PolyP chain  
460 requires 1 mol ATP per mol phosphate added. In algae. However, in the second reaction,  
461 one may hypothesize that 1 mol 1,3-bisphosphoglycerate could be regenerated from 1  
462 mol 3-phosphoglycerate by phosphoglycerate kinase at the expense of 1 mol ATP. The  
463 total cost (as ATP) of the second reaction is thus 2 mol ATP per mol phosphate group  
464 added to the PolyP chain. Note that throughout this study, we assume that PolyP is  
465 synthesized using the first scheme, i.e. the most parsimonious biochemical pathway.

466

467 Elongation of the PolyP chains requires phosphate uptake from the external medium.  
468 This phosphate group is taken up from the external medium either directly via  
469 membrane-bound orthophosphate transporters <sup>55-57</sup> or indirectly from a range of other  
470 phosphate-containing molecules (e.g. nucleotides, glycerophosphates, polyphosphates)  
471 with extracellular phosphatase (alkaline phosphatase or nucleotidase) that cleaves  
472 phosphate <sup>57, 58</sup>. Direct transport of phosphates in algal cells occurred either by active  
473 transport or facilitated diffusion ultimately requiring ATP <sup>57</sup>. In terrestrial plants, the  
474 uptake of 1 mol phosphate occurs via an H<sup>+</sup> cotransporter (secondary active transport)  
475 and thus requires the efflux of 1 mol H<sup>+</sup> by the ATPase at a cost of 1 mol ATP to  
476 maintain the transmembrane potential <sup>59</sup>. The same energy costs occur if Na<sup>+</sup> replaces H<sup>+</sup>  
477 in the phosphate transporter and the primary active, ATP-dependent, cation efflux <sup>60</sup>.  
478 Cleavage of phosphate performed by the enzyme alkaline phosphatase and nucleotidase  
479 do not require ATP or NAD(P)H (Brenda website). Assuming that PolyP is produced via  
480 a polyphosphate kinase (via the most parsimonious reaction 1), the total cost of PolyP  
481 biosynthesis (as ATP) can thus be approximated to 2 mol ATP per mol PO<sub>4</sub><sup>3-</sup> added to the  
482 polyphosphate chain.

483

484 Polyphosphate chains can also be degraded in orthophosphates by different transferases,  
485 kinases and hydrolases in bacteria and fungi <sup>61</sup>. The reaction catalysed by a  
486 polyphosphate kinase (see reaction 1 above) that produced polyphosphates can also run  
487 backward producing ATP or GTP and PO<sub>4</sub><sup>3-</sup>. AMP phosphotransferase can also catalyze  
488 the attack at a polyphosphate chain end by AMP producing ADP and Pi. As opposed to  
489 polyphosphate kinase and AMP-phosphotransferase, glucokinase requires energy as ATP

490 to liberate orthophosphate from polyphosphate; glucokinase catalyzes the conversion of  
491 glucose in glucose-6-phosphates coupled to the conversion of 1 ATP in ADP. Finally,  
492 hydrolases or phosphatase cleave polyphosphate chains in the presence of water without  
493 the use of ATP or NAD(P)H<sup>61-63</sup>.

494

495 Using a Redfield atomic ratio of 106:1 C:P, the total organic cell carbon concentrations in  
496 freshwater (23.23 mol C L<sub>cell</sub><sup>-1</sup>) or marine (11 mol C L<sub>cell</sub><sup>-1</sup>) algal cells, the energy cost of  
497 PolyP synthesis (2 mol ATP per mol PolyP or 2 mol absorbed photons per mol PolyP if  
498 ATP is produced via cyclic electron flow) and even assuming that virtually all  
499 intracellular P is incorporated in PolyP, we calculate that the cost of polyphosphate  
500 granules synthesis is only around 0.08% of the total biosynthetic cost of a freshwater or a  
501 marine cell.

502

## 503 **6. Examples for some metals and algae species where no metal efflux was observed**

504

505 In two freshwater green algae species (*Pseudokirchneriella subcapitata* and *Chlorella*  
506 *kesslerii*), the studies of Hassler and Wilkinson<sup>64</sup> and Wolterbeek et al.<sup>65</sup> have suggested  
507 that zinc efflux of a fixed proportion of intracellular zinc occurred constitutively at low  
508 rates (efflux rates are less than 10% of Zn uptake rates) even at high toxic free Zn<sup>2+</sup>  
509 concentrations suggesting that Zn efflux is not a major inducible Zn detoxification  
510 mechanism in these algae species. In addition, Cd efflux of Cd-loaded *P. subcapitata*  
511 cells has been shown to be negligible over a 4-h period<sup>66</sup> and modelling of Cd uptake in  
512 the freshwater alga *C. reinhardtii* exposed to a free Cd<sup>2+</sup> concentration of 7 nM (toxic on

513 cell division, but not yet toxic on cell volume yield) for 60 h suggests that Cd efflux is  
514 negligible<sup>67</sup>. Moreover, Angel et al<sup>68</sup> did not observe any Cu efflux by *P. tricornutum*  
515 cells previously exposed to 15 µg L<sup>-1</sup> total dissolved Cu for 72 h (a Cu concentration and  
516 exposure time inhibiting cell biomass by more than 70% relative to that of the control).

517

## 518 **7. Energy cost of As reduction and methylation**

519

### 520 **7.1 Biochemical pathway and energy cost of As reduction and methylation**

521

522 The biochemical pathway leading to methylation and reduction of As is poorly known in  
523 algae. Most of the knowledge we have of this pathway comes from the work performed  
524 in vertebrates and fungi (Hughes 2002, Bentley and Chasteen, 2002). Briefly, inorganic  
525 arsenate [iAs(V)] is thought to be reduced to inorganic arsenite [iAs(III)] followed by  
526 successive oxidative methylation and reduction reactions, which produce sequentially  
527 monomethylarsonic acid or MMA(V), monomethylarsonous acid or MMA(III),  
528 dimethylarsinic acid or DMA(V), dimethylarsinous acid or DMA(III) and  
529 trimethylarsenic oxide or TMAO(V), which is reduced to trimethylarsine gas or  
530 TMA(III) (reaction 3). This section describes the biochemical pathway and energy cost  
531 of As reduction and methylation.

532

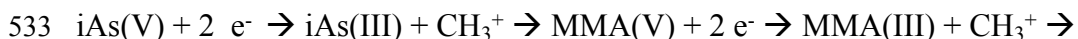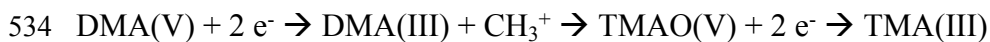

535 (3)



536 Once in the cell, iAs(V) can be reduced to iAs(III) coupled to the oxidation of two GSH  
537 molecules<sup>69</sup>. The regeneration of these 2 GSH via glutathione reductase cost 2 NADPH.  
538 Subsequently, iAs(III) could be complexed to GSH and/or exported out of the cells  
539 perhaps via silicic acid transporters (Lsi2), acting in silicic acid efflux with higher cytosol  
540 than external silicic acid concentration, as demonstrated in rice<sup>70</sup>. However, the gene  
541 homolog coding for Lsi2 is not present in eukaryotic algae  
542 (<http://www.ncbi.nlm.nih.gov>). iAs(III) can also be reduced with GSH and can be  
543 methylated with As methyltransferases as shown in thermophilic and acidophilic algae<sup>71</sup>.  
544 Note that this enzyme has been found in several algae species  
545 (<http://www.ncbi.nlm.nih.gov>). The methyl group used by As methyltransferase could be  
546 transferred by the S-adenosylmethionine (SAM or AdoMet) cycle<sup>72</sup>. In this cycle, 5-  
547 methyltetrahydrofolate (N5-Me-THF) is used as a methyl donor in the SAM cycle and  
548 can be regenerated from 5N,10C methylene tetrahydrofolate (5N,10C methylene THF).  
549 5N,10C methylene THF can be synthesized via two pathways at the same energy cost: 1)  
550 the serine-glycine cycle and 2) synthesis of serine from triose phosphate, conversion of  
551 serine to glycine and glycine catabolism<sup>23</sup>. Here we start by computing the cost of  
552 5N,10C methylene THF synthesis by both pathways before calculating the cost of the  
553 methyl transfer reactions in the SAM cycle.

554

555 The first possibility considered is that the 5N,10C methylene THF used in the synthesis  
556 of N5-Me-THF is assumed to come from the serine-glycine cycle. To allow for 5N,10C  
557 methylene THF synthesis in the dark requires that the starting point for the cycle is taken  
558 as serine derived from glycolytic or photosynthetic triose phosphate in glycolysis. The

559 serine-glycine cycle is initiated by the synthesis of 2 mol triose phosphate in  
560 photosynthesis, which requires 6 x 2 or 12 mol NADPH and 9 x 2 or 18 mol ATP.  
561 Conversion of 2 mol triose phosphate to 2 mol 3-phosphoglycerate produces 2 mol NADH  
562 and 2 mol ATP. 2 mol 3-phosphoglycerate are converted to 2 mol glycerate by a  
563 phosphatase and the 2 mol glycerate are converted to 2 mol hydroxypyruvate with  
564 production of 2 mol NADH. Conversion of 2 mol hydroxypyruvate to 2 mol serine using  
565 external  $\text{NH}_4^+$  and the GS-GOGAT pathway requires 4 mol ATP and 2 mol NAD(P)H.  
566 Overall, the production of 2 mol serine from 6 mol  $\text{H}_2\text{O}$ , 6 mol  $\text{CO}_2$  and 2 external mol  
567  $\text{NH}_4^+$  costs 10 mol NAD(P)H and 20 mol ATP. Conversion of 2 mol serine to 2 mol  
568 glycine converts 2 mol THF to 2 mol 5N,10C methylene THF. Conversion of 2 mol  
569 glycine to 1 mol serine involves production of 1 mol  $\text{CO}_2$ , 1 mol  $\text{NH}_4^+$  and 1 mol NADH.  
570 This initial reaction sequence leading to the synthesis of 1 mol serine converts 6 mol  
571  $\text{CO}_2$ , 6 mol  $\text{H}_2\text{O}$ , 2 external mol  $\text{NH}_4^+$  and 2 mol THF to 1 mol serine, 3 mol  $\text{CO}_2$ , 1 mol  
572 internal  $\text{NH}_4^+$  and 2 mol 5N,10C methylene THF . The overall cost is 9 mol NAD(P)H  
573 and 20 mol ATP with a cost of 40.5 mol absorbed photons to produce 9 mol NAD(P)H  
574 and 13.5 mol ATP by non-cyclic electron flow, and 6.5 mol absorbed photons to produce  
575 the remaining 6.5 mol ATP by cyclic electron flow, i.e. 47 mol absorbed photon to  
576 convert 2 mol THF to 2 mol 5N,10C methylene THF, or 23.5 mol photons per 1 mol THF  
577 converted to 1 mol 5N,10C methylene THF.

578

579 Subsequent to this, the serine-glycine cycle requires the synthesis of another molecule of  
580 serine besides the serine from the initial round of conversion of 2 mol THF to 2 mol  
581 5N,10C methylene THF. Synthesis of the additional serine, using internal  $\text{NH}_4^+$  from the

582 conversion of 2 glycine to 1 serine in the initial round costs 5 mol NAD(P)H and 9 mol  
583 ATP per serine. Conversion of the 2 serine to 2 glycine, and then conversion of the 2  
584 glycine to 1 serine, produces 2 mol 5N,10C methylene THF, 1 mol CO<sub>2</sub>, 1 mol NADH  
585 and 1 mol internal NH<sub>4</sub><sup>+</sup>. This gives an overall cost of 4 mol NAD(P)H and 9 mol ATP in  
586 producing 2 mol 5N,10C methylene THF, i.e. 2 mol NAD(P)H and 4.5 mol ATP for the  
587 production of 1 mol 5N,10C methylene THF. The production of 2 mol NADPH and 3  
588 mol ATP costs **9 mol absorbed photons** in non-cyclic electron flow, and production of  
589 the remaining 1.5 mol ATP by cyclic electron flow costs **1.5 absorbed photons**, a total  
590 of **10.5 mol absorbed photons**.

591

592 5N,10C methylene THF can also be synthesized from CO<sub>2</sub>, PAR, NH<sub>4</sub><sup>+</sup> and water via a  
593 second pathway involving the production of serine from triose phosphate in glycolysis,  
594 the conversion of serine to glycine and the catabolism of glycine to CO<sub>2</sub>, NH<sub>4</sub><sup>+</sup> and 2  
595 molecules of 5N,10C methylene THF. Synthesis of 1 mol triose P in photosynthesis from  
596 H<sub>2</sub>O and CO<sub>2</sub> uses 6 mol NADPH and 9 mol ATP. Conversion of 1 mol triose phosphate  
597 to 1 mol 3-phosphoglycerate produces 1 mol NADH and 1 mol ATP; phosphatase activity  
598 produces 1 mol glycerate from 1 mol 3-phosphoglycerate and this 1 mol glycerate is  
599 converted to 1 mol hydroxypyruvate with production of 1 mol NADH. Conversion of 1  
600 mol hydroxypyruvate to 1 mol serine using external NH<sub>4</sub><sup>+</sup> and the GS-GOGAT pathway  
601 requires 2 mol ATP and 1 mol NAD(P)H. Overall, the production of 1 mol serine from  
602 H<sub>2</sub>O, CO<sub>2</sub> and external NH<sub>4</sub><sup>+</sup> costs 5 mol NAD(P)H and 10 mol ATP. Conversion of 1  
603 mol serine to 1 mol glycine converts 1 mol tetrahydrofolate (THF) to 1 mol 5N,10C  
604 methylene THF. Catabolism of 1 mol glycine to 1 mol CO<sub>2</sub>, 1 mol NH<sub>4</sub><sup>+</sup> and 1 mol

605 NADH converts 1 mol THF to 1 mol 5N,10C methylene THF. Summing these costs, 4  
606 mol NAD(P)H and 10 mol ATP convert 2 mol THF to 2 mol 5N,10C methylene THF. In  
607 the steady state of 5N,10C methylene THF synthesis the  $\text{NH}_4^+$  produced in glycine  
608 catabolism can be used in amination of hydroxypyruvate, thus saving the 1 ATP used in  
609  $\text{NH}_4^+$  influx, so that the overall cost is 4 mol NAD(P)H and 9 mol ATP to convert 2 mol  
610 THF to 2 mol 5N,10C methylene THF. For converting 1 mol THF to 1 mol 5N,10C  
611 methylene THF the cost is **2 mol NAD(P)H** and **4.5 mol ATP**, equivalent to **10.5 mol**

612

613 We then need to describe the reactions of the SAM cycle (and compute their energy cost)  
614 using 5N,10C methylene THF generated above and the precursors [arsenite, MMA(III),  
615 DMA(III)] to be methylated. In the SAM cycle, a methyl group (derived by reduction  
616 from 5N,10C methylene THF) is first transferred from SAM or AdoMet to a precursor  
617 [arsenite, MMA(III), DMA(III)] by a transferase (in this case, As methyltransferase),  
618 producing S-adenosylhomocysteine (SAH). Second, using the enzyme S-  
619 adenosylhomocysteine hydrolase, SAH is converted into adenosine and homocysteine in  
620 the presence of water and the enzyme cofactor ( $\text{NAD}^+$ ) is converted into NADH. Third,  
621 homocysteine is converted into methionine through transfer of a methyl group from 5-  
622 methyltetrahydrofolate (N5-Me-THF) by a methionine synthase (vitamin B12-dependent  
623 or -independent) producing tetrahydrofolate (THF). Fourth, N5-Me-THF is regenerated  
624 from 5N,10C methylene THF via the enzyme methylene tetrahydrofolate reductase,  
625 which uses 1 NADPH. Finally, 1 mol SAM is recycled from 1 mol methionine using the  
626 enzyme methionine adenosyltransferase, which uses 1 mol ATP. Overall, the SAM cycle,

627 which transfers a methyl group to As methyl transferase, requires 1 NADPH and 1 ATP,  
628 but also generates 1 NADH.

629

630 In summary, iAs(V) is first reduced to iAs(III) at a cost of 2 NAD(P)H for the  
631 regeneration of two GSH molecules. iAs(III) can then be sequentially reduced by GSH  
632 and methylated by the SAM cycle three times each yielding TMAO and TMA. The three  
633 reduction steps proceed at a potential cost of 6 NADPH if GSH reduces As(V) species  
634 and has to be regenerated. The mechanistic cost of reduction/methylation of 1 mol As(V)  
635 (without taking into account the biosynthetic cost of methyl groups) is 11 mol NAD(P)H  
636 and 3 mol ATP coupled to the production of 3 mol NADH, i.e. a cost of 8 mol NAD(P)H  
637 and 3 mol ATP. Adding the cost of 5,10 methylene THF synthesis for the three rounds of  
638 the SAM cycle (required to transfer three methyl groups to oxidised inorganic or organic  
639 As(III) species), the total energy cost of iAs(V) reduction and methylation from CO<sub>2</sub>,  
640 PAR, and water is 14 mol NAD(P)H and 16.5 mol ATP.

641

642 Conversion of the ATP and NAD(P)H cost of As reduction and methylation to photon  
643 requirements uses the values of 9 absorbed mol photons to produce 2 mol NADPH and 3  
644 mol ATP in non-cyclic electron flow, which is equivalent to 4.5 absorbed mol photons  
645 per 1 mol NADPH and 1.5 mol ATP. In cyclic electron flow, 1 absorbed mol photon is  
646 required to produce 1 mol ATP<sup>12, 19</sup>. The production of 14 mol NADPH (as well as the  
647 21 mol coupled ATP) by non-cyclic electron flow required for the reduction/methylation  
648 of 1 mol As(V) costs 63 mol photons (14x4.5). The 4.5 mol ATP in excess would have  
649 cost 4.5 mol absorbed photons if they had been produced via cyclic electron flow.

650 Consequently, the photon energy cost for the reduction/methylation of 1 mol As(V) is  
651 **58.5 mol absorbed photons.**

652

## 653 **7.2 Experimental measurements of As accumulation in phytoplankton**

654

655 The intracellular As concentration that inhibits cell growth of eukaryotic algae species  
656 differs by several orders of magnitude depending mostly on the species. Indeed, we  
657 looked at six reports in the literature, in which As uptake has been measured in parallel to  
658 toxicity on cell growth and convert the amount of bioaccumulated As per cell dry weigh  
659 into cellular As concentration normalized to cell biovolume. Our aimed here was to  
660 explore the variability of As cell concentration in different phytoplankton species beyond  
661 which As toxicity effects on growth occurs in order to constrains a probable maximum  
662 As intracellular concentration and evaluate the probable upper bound energy cost of  
663 detoxification of such a high As cellular concentration.

664

665 We first consider the study of Knauer and Hemond<sup>73</sup>. These authors studied As toxicity  
666 and accumulation in the green alga, *Chlorella* sp., isolated from Upper Mystic Lake, a  
667 arsenic-contaminated lake near Boston, MA. At a concentration of 1 nM total As(V) and  
668 high P, which is already slightly toxic on the cell yield obtained after the exponential  
669 growth phase of 2 weeks, the As cell quotas (intracellular and adsorbed As; no phosphate  
670 rinsing steps were used to desorb As at the cell surface) are less than  $10^{-10}$  mol As (mg  
671 DW algae<sup>-1</sup>) corresponding to an As accumulation rate less than  $10^{-4}$   $\mu$ mol As per mg  
672 DW algae per day and As reduction rate less than  $10^{-11}$  mol As per mg DW algae per day.

673 According to Nalewajko <sup>48</sup>, a strain of *Chlorella* (*Chlorella pyrenoidosa*) has 255 µg DW  
674 per µL of biovolume (or 255 mg DW per 10<sup>-3</sup> L of biovolume). Converting the data of  
675 Knauer and Hemond <sup>73</sup> on an “approximate” basis of cell biovolume instead of cell dry  
676 weight means that the As cell quotas are less than 2.6 x 10<sup>-5</sup> mol As L<sub>cell</sub><sup>-1</sup> corresponding  
677 to an As accumulation rate less than 26 µmol As per L<sub>cell</sub><sup>-1</sup> per day and As reduction rate  
678 less than 2.55 µmol As per L<sub>cell</sub><sup>-1</sup> per day.

679

680 In the second study considered here, i.e. the paper of Maeda et al. <sup>74</sup>, 67 mM inorganic  
681 As(V) started to decrease the cell yield (20% cell yield inhibition) of *C. vulgaris* obtained  
682 after growing a culture up to the stationary growth phase at As cell quotas (only rinsed  
683 with water!) of around 18-19 mg As per g dry weight or 0.24-0.26 mmol As per g DW or  
684 240 to 260 nmol As per mg DW. In this case, the cellular As concentration required to  
685 inhibit cell growth appears to be very high (around 58 to 62 mM assuming 255 µg DW  
686 per µL of biovolume <sup>48</sup>) although these cell concentrations overestimate the true  
687 intracellular As concentration since the As adsorbed onto the cells was not removed in  
688 that study. Moreover, they only measured the cell yield in the stationary phase.  
689 Measuring As toxicity in the stationary growth phase could underestimate As toxicity if  
690 algae deplete dissolved As concentration in solution and then resumed their growth  
691 through As biodilution and then may reach higher final cell density in the stationary  
692 growth phase (relative to the case where dissolved As concentration is buffered in  
693 solution) after a longer log growth phase than the As-free control.

694

695 The third study was that of Karadjova et al. <sup>75</sup>. In that study, the As cellular quotas (rinsed  
696 with phosphate) (measured after 72-h of exposure to inorganic As(V) or As(III) ) close to  
697 the threshold of As toxicity on growth rate of the marine green alga *Chlorella salina* was  
698 around  $10^{-18}$  mol As per cell at three different external phosphorus concentration  
699 (compared Fig. 2 and Fig. 3). In their Fig. 5A, the relative proportion of each As species  
700 (As(V), As(III), MMA, DMA, DHF) accumulated within the algae is shown. Taking a  
701 cell volume of *C. salina* of  $116.29 \mu\text{m}^3$  per cell <sup>76</sup>, the intracellular As concentration  
702 required to inhibit *C. salina* growth is around  $8.6 \mu\text{mol As per } L_{\text{cell}}$ .

703

704 Fourth, Levy et al. <sup>77</sup> calculated a LOEC for a 72-h exposure to As(III) of  $3.75 \text{ mg L}^{-1}$  in  
705 *Monoraphidium arcuatum*. For As(V), the LOECs were  $0.081$  and  $1.91 \text{ mg L}^{-1}$  for initial  
706  $\text{PO}_4^{3-}$  concentration of  $0.15$  and  $1.5 \text{ mg L}^{-1}$  (i.e. molar N:P ratios of 150:1 and 15:1  
707 respectively). At  $125 \mu\text{g initial As(V) L}^{-1}$  and  $0.15 \text{ mg P L}^{-1}$  (i.e. an As(V) concentration  
708 close to the LOEC 72 h), the mean As cell quota (cells rinsed with phosphate) after 72 h  
709 was  $1200 \times 10^{-18} \text{ g cell}^{-1}$  ( $16 \times 10^{-18} \text{ mol cell}^{-1}$ ). At  $1000 \mu\text{g As(V) L}^{-1}$  and  $1.5 \text{ mg L}^{-1}$   
710 (close to the LOEC of  $1.91 \text{ mg L}^{-1}$ ), mean As cell quota (cells rinsed with phosphate)  
711 after 72 h was  $400 \times 10^{-18} \text{ g cell}^{-1}$  ( $5.3 \times 10^{-18} \text{ mol cell}^{-1}$ ). Taking a relatively modest cell  
712 volume of  $42 \mu\text{m}^3$  <sup>78</sup>, the intracellular As concentration required to inhibit *M. arcuatum*  
713 growth is around  $1.2$  to  $3.7 \times 10^{-4} \text{ mol } L_{\text{cell}}^{-1}$ .

714

715 Fifth, in the study of Pawlik-Skoronska et al. <sup>79</sup>, a 24-h exposure of the green microalga  
716 *Stichococcus bacillaris* to a slightly growth-inhibitory As(V) concentration ( $100 \mu\text{M}$ ) at  
717 pH 6.8 and 8.2 resulted in As cell content of  $4.04$  and  $1.27 \mu\text{mol g}^{-1} \text{ DW}$ , respectively.



718 Taking a value of the dry weight per cell biovolume of *S. bacillaris* of around 231.7 g  
719 DW per L of cell volume <sup>48</sup>, we calculated that cellular concentrations of 295 to 936  
720  $\mu\text{mol As per L}_{\text{cell}}$  are slightly toxic to *S. bacillaris*.

721

722 Sixth, Wang et al. <sup>80</sup> have found that at As(V) concentrations slightly toxic to  
723 *Scenedesmus obliquus*, less than  $10^4 \mu\text{g As per g DW}$  was accumulated inside the cells  
724 (the cells were rinsed with phosphate). For *Scenedesmus obliquus*, the EC50 on growth  
725 rate was 12929  $\mu\text{g intracellular As per g DW}$  (or 172.6  $\mu\text{mol As per g DW}$ ) in medium  
726 with low P (no EC50 available at high P). For *Chlamydomonas reinhardtii*, the EC50 was  
727 3298 and 408  $\mu\text{g As per g DW}$  (or 44.0 and 5.45  $\mu\text{mol As per g DW}$ ) in the presence of  
728 high and low P, respectively (Table 1). Using values determined in *Chlamydomonas*  
729 *angulosa* of 317.8 g DW per L of algae and in *Scenedesmus quadricauda* of 498.5 g DW  
730 per L of algae, the EC50 on a cell volume basis can be estimated, i.e. an EC50 of 86  
731 mmol As per  $\text{L}_{\text{cell}}$  for *S. obliquus* and EC50s of 1.7 to 14 mmol As per  $\text{L}_{\text{cell}}$  for *C.*  
732 *reinhartii*.

733

### 734 **7.3 Calculating the energy cost of As biotransformation in relation to As**

#### 735 **accumulation**

736

737 It has been shown that up to around 30% of cellular As(V) can be reduced into As(III) <sup>75</sup>,  
738 <sup>81</sup> and part of this As(III) is then methylated although at rates typically much lower than  
739 As(V) reduction rate <sup>82</sup> and the methylated As species account for a low proportion of  
740 total cellular As <sup>75, 77</sup>. There is also a part of cellular As(III) that is excreted in solution.

741 This As efflux is thought to be relatively slow in *Chlorella salina*. Indeed, this species  
742 exposed to 10  $\mu\text{M}$  As(V) for 72 h accumulated around  $10^{-17}$  mol As per cell, but excrete  
743 in the dissolved phase 55 to 65% of the total cellular As over 72 h of depuration <sup>75</sup>.  
744 Assuming a specific growth rate of  $1 \text{ d}^{-1}$  or a doubling time  $[\text{Ln}(2)/\mu]$  of 0.693 d or 16.6 h  
745 and a constant As loss rate over the 72 h exposure, only 13 to 15% of cell As is lost  
746 during the period for growing a whole cell. Taking a mean cell volume of *C. salina* of  
747  $116 \mu\text{m}^3$  per cell <sup>76</sup>, the As cellular concentration lost during a period of one cell doubling  
748 is only around 11 to 13  $\mu\text{M}$  As. Assuming an energy cost of 1 ATP per mol of As  
749 exported from the cells, based on the ATP cost for transport of numerous ions across the  
750 plasmalemma <sup>60</sup> and considering a cost of 1 mol absorbed photons per mol ATP produced  
751 via cyclic electron flow, the energy cost of As(III) efflux is only  $2.0$  to  $2.3 \times 10^{-6}$  % of the  
752 total energy cost for growing a *C. salina* cell.

753

754 Considering that the proportion of total As cellular concentration detoxified by reduction  
755 and methylation is lower than 30% and that As efflux is slow, then, even with some  
756 allowance for the slow As efflux, the steady-state cellular concentration of detoxified As  
757 is expected to be lower than the total measured cellular steady-state As concentration. For  
758 algal cells accumulating at most around 50 mM As(V) concentrations at the onset of As  
759 toxicity on growth (20% cell yield inhibition after several days of growth) <sup>74</sup>, the energy  
760 cost invested in As detoxification is therefore probably lower than 2.95 mol absorbed  
761 photons per  $L_{\text{cell}}$  (assuming that all cellular As is detoxified and using a cost of 58.5 mol  
762 absorbed photons per mol reduced/methylated As(V), see section 7.1), which is 0.5% of

763 the total photon energy cost for growth of a freshwater cell (557.52 mol absorbed photons  
764 per  $L_{\text{cell}}$ ; see method section of the main text body).

765

766 **8. Hg reduction: Biochemical mechanisms, occurrence in algae and energy cost**

767

768 **8.1 Biochemical mechanism of Hg reduction and energy cost of Hg reduction**

769

770 Phytoplankton can reduced Hg(II) into Hg(0) as a detoxification mechanism <sup>83-86</sup>.

771 Although several cases of As methylation have been reported in the literature, no

772 evidence currently exists, to our knowledge, supporting the methylation of Hg in

773 phytoplankton.

774

775 The mechanism of Hg reduction in algae is still unknown, but studies have shown that the

776 reduction depends on Hg concentration, but not light <sup>84, 85</sup>. Since plasmalemma redox

777 enzymes reducing Cu(II) and Fe(III) exist in phytoplankton <sup>87-89</sup> one might hypothesize

778 that Hg(II) is inadvertently reduced by such enzymes. The genes of a putative Fe

779 reductase (Fre1p in yeast) have been found in marine diatoms suggesting that Fe

780 reduction and uptake occurs in diatoms with similar pathways than that found in yeast <sup>89</sup>.

781 The Fre1p enzyme couples Fe(III) reduction into Fe(II) to NADPH oxidation <sup>90</sup>.

782

783 Assuming that Hg reduction in phytoplankton proceeds via an unspecific reaction such as

784 plasmalemma redox enzymes, which use NADPH, then the cost of Hg reduction into

785 Hg(0) is only 1 mol NAD(P)H per mol Hg(II) reduced. Production of 1 mol NADPH

786 costs 4.5 mol absorbed photons, but generates 1.5 mol ATP via non-cyclic electron flow.

787 This ATP would have cost 1.5 mol absorbed photons when produced by cyclic electron

788 transport. Therefore, the net cost of unspecific Hg reduction is **3 mol absorbed photons**  
789 **per mol of reduced Hg(II).**

790

791 **8.2 Measurements of Hg reduction in the literature and Hg reduction energy cost**  
792 **relative to energy for cell growth**

793

794 The freshwater alga, *Euglena gracilis*, has been shown to reduce Hg(II) at rates of 2.2  
795 fmol Hg cell<sup>-1</sup> h<sup>-1</sup> and 0.7 fmol Hg cell<sup>-1</sup> h<sup>-1</sup> when exposed to a rather high Hg(II)  
796 concentration of 5 μM for 1 h and 3 h, respectively <sup>84</sup>. Using a cell volume of 22.3 pL <sup>91</sup>,  
797 the alga reduces Hg at rates of 31.4 to 98.6 μmol Hg L<sub>cell</sub><sup>-1</sup> h<sup>-1</sup>. Taking a specific growth  
798 rate of around 1.2 d<sup>-1</sup> <sup>92</sup> equivalent to a doubling time of around 14 h, the amount of Hg  
799 reduced per unit of cell volume for the growth of a whole cell can reach around 1.4 mmol  
800 Hg per L<sub>cell</sub>.

801

802 The marine diatom, *Thalassiosira weissflogii*, exposed to 5 nM Hg(II) in the light or in  
803 the dark produced around 92 zmol Hg(0) cell<sup>-1</sup> h<sup>-1</sup> <sup>85</sup>. This concentration of Hg(II) did not  
804 affect (or slightly affected by less than 10%) the specific growth rate of this species.

805 Based on a cell volume of 1370 μm<sup>3</sup> or 1.37 pL <sup>93</sup>, it means that the Hg reduction rate of  
806 *T. weissflogii* is around 67 nmol L<sub>cell</sub><sup>-1</sup> h<sup>-1</sup>. Thus for a specific growth rate of 1 d<sup>-1</sup> <sup>85</sup> or a  
807 doubling time of 0.69 day (Ln(2)/1) or around 17 h, then the amount of cellular Hg that  
808 can be reduced during the growth of a cell is around 1 μmol L<sub>cell</sub><sup>-1</sup>.

809

810 Mason et al. <sup>83</sup> have shown that the Hg production rate in a range of eukaryotic marine  
811 phytoplankton species (*Thalassiosira weissflogii*, *Dunaliella tertiolecta*, *Pavlova lutheri*,  
812 *Pleurochrysis carterae*) exposed to 0.5 nM Hg(II) vary between 1.1 and 20  $\mu\text{mol Hg cell}^{-1}$   
813  $\text{h}^{-1}$ . The Hg(II) concentration is probably not toxic on cell growth since the reported  
814 EC50 of Hg(II) in *T. weissflogii* and *D. tertiolecta* is 250 and 5000 nM Hg(II),  
815 respectively <sup>94</sup>. These Hg reduction rates when converted on a biovolume basis vary  
816 between 1.7 to 234  $\text{nmol Hg L}_{\text{cell}}^{-1} \text{h}^{-1}$ , which is of the same order of magnitude than the  
817 Hg reduction rate measured by Morelli et al. <sup>85</sup>.

818

819 Wu and Wang <sup>86</sup> found that Hg(0) production rate in three marine phytoplankton species  
820 (*Chlorella autotrophica*, *Thalassiosira weissflogii*, and *Isochrysis galbana*) exposed to  
821 250 nM initial Hg(II) for 72 h was equal to or lower than around 0.06  $\text{pmol mol C}^{-1} \text{h}^{-1}$   
822 (their Fig 3B). Using a mean intracellular C concentration of 11 mol C per  $\text{L}_{\text{cell}}$   
823 determined by Ho et al. <sup>95</sup> in 15 marine phytoplankton species, the above Hg(0)  
824 production rate measured by Wu and Wang <sup>86</sup> is equal to 0.66  $\text{pmol L}_{\text{cell}}^{-1} \text{h}^{-1}$ , which is  
825 much lower than the Hg reduction rates determined by Mason et al. <sup>83</sup> and Morelli et al.  
826 <sup>85</sup>.

827

828 Therefore, at low nM Hg(II) exposure concentrations associated to the reduction of one  
829 micromole Hg per  $\text{L}_{\text{cell}}$  for the time required for a cell doubling, the photon cost for Hg  
830 reduction for the growth of a whole cell is expected to be on the range of micromole  
831 absorbed photons per  $\text{L}_{\text{cell}}$  (the cost of Hg reduction is around 3 mol absorbed photons per  
832 mol of reduced Hg(II)). Therefore, the net cost of Hg reduction represents a very low

833 proportion ( $\approx 10^{-7}$  to  $10^{-6}$  %) of cellular energy for the growth of a whole cell. For  
834 *Pavlova lutheri*, the phytoplankton species investigated showing the fastest Hg reduction  
835 rate ( $234 \text{ nmol Hg L}_{\text{cell}}^{-1} \text{ h}^{-1}$ ), the energy cost associated to Hg reduction over the period  
836 of a cell doubling (assuming  $\mu \approx 1 \text{ d}^{-1}$ ; as measured by Thompson et al. <sup>96</sup>) is only  $5 \times 10^{-6}$   
837 % of the total cellular energy cost. Even if the Hg reduction was as high as that measured  
838 in *E. gracilis* exposed to  $5 \text{ }\mu\text{M Hg}$  (i.e. close to  $100 \text{ }\mu\text{mol Hg L}_{\text{cell}}^{-1} \text{ h}^{-1}$ ), the photon cost  
839 of Hg reduction would still be a very low proportion of the total photon energy cost for  
840 growth ( $8 \times 10^{-4}$  %).

841

## 842 **9. Energetics of the ascorbate-glutathione cycle, glutathione peroxidase cycle and** 843 **redox proteins**

844

845 The hydrogen peroxide produced by the reaction of SOD with superoxide can be  
846 detoxified to water by catalase, the ascorbate-glutathione cycle and the glutathione  
847 peroxidase (GPX) cycle. Within the ascorbate-glutathione cycle, ascorbate peroxidase  
848 (APX) first oxidizes ascorbate into monodehydroascorbate (MDA), which is reduced  
849 back into ascorbate by MDA reductase (MDAR) at the cost of 1 NADPH. Additionally,  
850 some MDA is spontaneously converted into dehydroascorbate (DHA), which can be  
851 reduced to ascorbate by DHA reductase (DHAR) with the help of GSH that is oxidized to  
852 GSSG. The GSH of the former reaction is regenerated by glutathione reductase (GR),  
853 which re-converts GSSG in GSH. Alternatively, the GPX cycle converts  $\text{H}_2\text{O}_2$  into water  
854 using reducing equivalents from GSH. GSH is again regenerated from GSSG with the  
855 help of GR at a cost of 1 NADPH <sup>97</sup>.

856

857 Apart from the classical enzymes (e.g. SOD, CAT, APX, and GR) protecting against  
858 oxidative stress, three other more recently identified redox proteins (thioredoxin,  
859 glutaredoxin and peroxiredoxin) in plants and algae are also involved in detoxifying  
860 ROS. The first redox proteins called thioredoxins can directly reduce  $H_2O_2$ ,  
861 dehydroascorbate, and certain radicals in plant and algal cells. They can act as electron  
862 donors and thus facilitates the reduction of other proteins such as another redox protein,  
863 peroxiredoxin, that scavenges cellular hydroperoxides. The oxidized disulfide  
864 thioredoxins can be reduced back in thioredoxins by the flavoenzyme thioredoxin  
865 reductase in a NAD(P)H-dependent reaction. Second, glutaredoxins are redox proteins  
866 sharing many functions of thioredoxins, but that can be reduced by GSH. Glutaredoxins  
867 can reduce dehydroascorbate,  $H_2O_2$  and APX. Since the reduced GSH used in the  
868 reaction of glutaredoxins can be regenerated with GR, both glutaredoxin and thioredoxin  
869 cost 1 NAD(P)H. Third, the thiol groups of peroxiredoxin reduces  $H_2O_2$ , hydroperoxides  
870 and peroxynitrites. The oxidized peroxiredoxin is then reduced with the help of  
871 thioredoxin or glutaredoxin regenerating the functional peroxiredoxin with reduced thiol  
872 groups <sup>97</sup>. Therefore, the energy cost to detoxify each ROS with the help of thioredoxin,  
873 glutaredoxin and peroxiredoxin is one NAD(P)H.

874

## 875 **10. Hydrophilic nonenzymatic antioxidant**

876

877 GSH is thought to have a pivotal role in metal(loid) detoxification due to metal(loid)  
878 complexation, its ROS detoxification ability and its high concentration in the mM range



879 <sup>98</sup>. Steady-state total GSH concentration is usually tightly regulated in freshwater algae  
880 species at a fixed total concentration in response to low non-growth inhibitory Cd and Cu  
881 exposure <sup>33, 44, 99, 100</sup>. By contrast, GSH cellular concentration (amount of GSH per  $L_{\text{cell}}$ ) is  
882 expected to decrease at higher toxic Cd concentrations on growth even though GSH cell  
883 quotas did not change significantly <sup>33, 44</sup> since algal cell volume sensitively increase at  
884 [Cd] that inhibits the growth of *C. reinhardtii* <sup>101</sup>. Note that at high growth-inhibitory Cu  
885 concentrations, GSH concentrations decreased in *C. vulgaris* <sup>100</sup>. Also, exposure to the  
886 metalloids As (concentration inhibiting by 12 to 27% the growth rate) and Sb (non-  
887 inhibitory concentration) respectively caused an increase and a decrease in GSH cell  
888 quotas of *Scenedesmus vacuolatus*, but potential changes in cell volume were not  
889 reported and calculation of GSH cell concentration cannot be performed <sup>41</sup>. Once GSH is  
890 converted in GSSG in the presence of ROS, GSH can be rapidly regenerated via  
891 glutathione reductase at a cost of only 1 NAD(P)H <sup>102</sup>. Taking a second order rate  
892 constant of GSH oxidation by the  $\bullet\text{OH}$  radicals <sup>103</sup> of  $1.4 \times 10^{10} \text{ M}^{-1} \text{ s}^{-1}$  and assuming  $10^{-18}$   
893  $\text{M } \bullet\text{OH}$  in unstressed cells <sup>104</sup>, it follows that over the period of a cell doubling (17 h  
894 assuming a specific growth rate of  $1 \text{ d}^{-1}$ ), less than 0.1% of total cellular GSH is oxidized  
895 by  $\bullet\text{OH}$  in unstressed cell. Regeneration of 0.1% of a cellular pool of 10 mM GSH costs  
896 only  $3 \times 10^{-5}$  mol absorbed photons, i.e., less than around  $10^{-5} \%$  of the total energy cost  
897 for growth. Consequently, the energy cost of GSH regeneration (only considering GSH  
898 oxidation by the radical  $\bullet\text{OH}$ ), particularly in algal cells exposed to metal(loid)  
899 concentrations close to the NOEC, is likely a low proportion of the total energy cost for  
900 growth.  
901

902 Ascorbate is another major antioxidant in algal cells present at millimolar concentrations.  
903 Ascorbate concentrations in a range of fresh and marine phytoplankton species, which  
904 were compiled in 1995 by Raven <sup>105</sup>, were approximately between 0.4 and 28 mmol L<sub>cell</sub><sup>-1</sup>  
905 <sup>1</sup>. Subsequent measurements by Urzica et al. <sup>106</sup> of the mean intracellular ascorbate  
906 concentration in *C. reinhardtii* cells cultivated under optimal growth conditions yielded  
907 values around 0.1 mmol L<sub>cell</sub><sup>-1</sup> <sup>106</sup> using a critical cell volume of 140 fL at which  
908 synchronized *C. reinhardtii* cells (12 h light: 12h dark cycle) divide <sup>107</sup>. Also, Sunda et al.  
909 <sup>103</sup> reported intracellular ascorbate concentrations of around 6 mM in *E. huxleyi*. Oxidized  
910 ascorbate can be reduced back into ascorbate by MDA reductase (MDAR) at the cost of  
911 only 1 NAD(P)H or 3 mol absorbed photons (i.e., 4.5 mol photons per mol NAD(P)H by  
912 non-cyclic electron flow minus the cost saved for synthesizing the coupled 1.5 mol ATP  
913 or 1.5 mol photons by cyclic electron flow). Taking a second order rate constant of ASC  
914 oxidation by the •OH radicals of 1.1 x 10<sup>10</sup> M<sup>-1</sup> s<sup>-1</sup> tabulated in Sunda et al. <sup>103</sup> and  
915 assuming 10<sup>-18</sup> M •OH in unstressed cells <sup>104</sup>, it follows that over the period of a cell  
916 doubling (17 h assuming a specific growth rate of 1 d<sup>-1</sup>), less than 0.1% of total cellular  
917 ASC is oxidized by •OH in unstressed cell. Regeneration of 0.1% of a cellular pool of 6  
918 mM costs only 1.8 x 10<sup>-5</sup> mol absorbed photons, i.e., less than 10<sup>-5</sup> % of the total energy  
919 cost for growth. Consequently, the replacement cost of ASC (only considering ASC  
920 oxidation by •OH), particularly in algal cells exposed to metal(loid) concentrations close  
921 to the NOEC, is likely a low proportion of the total energy cost for growth.

922

923 The following reasoning further illustrates that regeneration of reduced ASC and GSH is  
924 likely a minor energy expenditure. Indeed, taking GSH and ASC cell concentrations of

925 10 mM and assuming that all the GSH and ASC pool is oxidized and enzymatically  
926 regenerated over the course of a cell doubling at a cost of 1 NAD(P)H (or 3 mol absorbed  
927 photons) per mol ASC or GSH, this regeneration of ASC and GSH would each cost 3 x  
928  $10^{-2}$  mol absorbed photons, i.e., around  $5.4 \times 10^{-3}$  % and  $1.1 \times 10^{-2}$  % of the total energy  
929 required for growing a whole freshwater or marine phytoplankton cell, respectively. This  
930 clearly shows that even if the turnover of GSH and ASC in algal cells was rapid,  
931 regeneration of both antioxidants would likely be a minor energy expenditure.

932

933 In plants, proline is mainly synthesized from glutamate in the cytosol with the help of two  
934 enzymes. Glutamate is first reduced to glutamate-semialdehyde (GSA) by the pyrroline-  
935 5-carboxylate synthetase (P5CS) enzyme. Second, GSA is spontaneously converted to  
936 pyrroline-5-carboxylate (P5C). Third, the P5C intermediate is reduced to proline by the  
937 P5C reductase (P5CR). Each enzymatic reduction requires 1 NAD(P)H<sup>108</sup>. Therefore,  
938 the biosynthesis of 1 mol proline from 1 mol glutamate costs 2 mol NAD(P)H while the  
939 biosynthesis of 1 mol glutamate costs 9 mol NAD(P)H and 17 mol ATP if NH<sub>4</sub><sup>+</sup> is the N  
940 source or 13 mol NAD(P)H and 17 mol ATP if NO<sub>3</sub><sup>-</sup> is the N source (See section on the  
941 energy cost of phytochelatin synthesis). Therefore, the energy cost of biosynthesis of 1  
942 mol proline from CO<sub>2</sub>, N, PAR and water is 11 mol NAD(P)H and 17 mol ATP if NH<sub>4</sub><sup>+</sup>  
943 is the N source or 15 mol NAD(P)H and 17 mol ATP if NO<sub>3</sub><sup>-</sup> is the N source. On a basis  
944 of absorbed photons, the biosynthetic cost of 1 mol proline is either **50 or 62 mol**  
945 **absorbed photons** if NH<sub>4</sub><sup>+</sup> and NO<sub>3</sub><sup>-</sup>, respectively, are the N source.

946

947 The basal intracellular concentration of free proline in freshwater phytoplankton is in the  
948 range 100  $\mu\text{M}$  to 3  $\text{mM}$  <sup>109-112</sup>, based on published measurements of free proline quotas in  
949 algae and conversion with cell volumes measured in each species <sup>113</sup>. By comparison,  
950 internal proline concentrations in marine phytoplankton vary between 2  $\text{mM}$  and 340  $\text{mM}$   
951 at the salinity of seawater (around 600  $\text{mM}$   $\text{NaCl}$ ) <sup>114, 115</sup>. Intracellular proline  
952 concentrations in freshwater phytoplankton were shown to increase in response to metal  
953 exposure. The intracellular proline concentration in *Chlorella vulgaris* was shown to  
954 increase from 0.8 to around 8  $\text{mmol L}_{\text{cell}}^{-1}$  after 10 h of exposure to 2.5  $\mu\text{M}$  total Cu and 5  
955  $\mu\text{M}$  total Cr. These Cu and Cr treatments inhibited the algal growth rate by around 15%  
956 and 20% respectively. However, the cellular proline level returns to near basal levels  
957 after 25 h of exposure <sup>110</sup>. The study of Mallick <sup>116</sup> also showed that the cellular proline  
958 concentration in *Chlorella vulgaris* did not significantly increase for a 72-h exposure at  
959 low (non-growth-inhibitory) Cu concentrations (72 h), but at toxic Cu concentrations on  
960 growth, proline started to increase. In the species *Chlorella* sp., the intracellular free  
961 proline concentrations also increased in response to exposures to toxic Cu or Cd  
962 concentrations on growth, but the intracellular proline concentrations remained below  
963 around 290  $\mu\text{mol L}_{\text{cell}}^{-1}$  <sup>109</sup>. The observed transitory induction of proline biosynthesis at  
964 internal concentrations below 8  $\text{mM}$  is expected to contribute a minor fraction (< 0.1%)  
965 of the total energy cost for growth.

966

967 DMSP and GBT are effective antioxidant in marine phytoplankton although less effective  
968 scavenger of the  $\bullet\text{OH}$  radical than ASC and GSH <sup>103, 117, 118</sup>. DMSP and GBT can reach  
969 high concentrations usually on the order of 1-200  $\text{mM}$  in marine diatoms and

970 coccolithophores <sup>119, 120</sup> although very high DMSP concentration up to around 1 M has  
971 been reported in free-living marine dinoflagellates <sup>121</sup>. Since there are no known  
972 pathways that can effectively recycle DMSP and GBT (analogous to the recycling of  
973 GSSG in GSH by the GR), both antioxidants need to be *de novo* synthesized at relatively  
974 high photon energy costs compare to those of other antioxidants. Indeed, *de novo* steady-  
975 state biosynthesis of 1 mol DMSP in phytoplankton costs 93 mol absorbed photons  
976 whereas *de novo* biosynthesis of 1 mol GBT costs 91 to 108 mol absorbed photons using  
977  $\text{NH}_4^+$  or  $\text{NO}_3^-$  as the N source <sup>122</sup>. Although DMSP and GBT could be a costly process  
978 for ROS scavenging if their synthesis were strongly up-regulated, no studies, to our  
979 knowledge, have shown an increase in DMSP or GBT concentrations in marine  
980 phytoplankton exposed to toxic concentrations of metal(loid)s. Indeed, DMSP  
981 intracellular concentrations are not up-regulated (and not totally regenerated) in the  
982 marine algae *E. huxleyi* exposed to a growth-inhibitory Cu concentration (1 nM  $\text{Cu}^{2+}$ ),  
983 but rather are decreased under Cu stress <sup>103</sup>.

984

985 Even though turnover rates of DMSP in metal(loid)-exposed cells are currently unknown,  
986 we attempted to constrain the probable energy cost due to DMSP regeneration by *de novo*  
987 DMSP biosynthesis. According to the following reasoning, significant depletion of  
988 intracellular DMSP due to oxidation by ROS (and significant energy loss due to DMSP  
989 oxidation) is unlikely at least at metal(loid) concentration close to the NOEC. Indeed,  
990 based on the published rate constant of DMSP oxidation by  $\bullet\text{OH}$  ( $k = 9 \times 10^8 \text{ M}^{-1} \text{ s}^{-1}$ ) and  
991  $\bullet\text{O}_2^-$  ( $k = 8.3 \text{ M}^{-1} \text{ s}^{-1}$ ) radicals <sup>123</sup>, an intracellular  $\bullet\text{OH}$  concentration in unstressed cells of  
992  $10^{-18} \text{ M}$  <sup>104</sup> and a chloroplastic  $\bullet\text{O}_2^-$  concentration of around  $10^{-9} \text{ M}$  <sup>124</sup>, less than  $10^{-4} \%$  of

993 intracellular DMSP should be oxidized by these two radicals over a period of one day.  
994 This suggests that even if a considerable increase in ROS production under a severe  
995 metal(loid) stress occurred, the experimentally measured cellular DMSP pool would not  
996 decrease significantly. Even at the high intracellular DMSP concentrations measured in  
997 marine dinoflagellates ( $\approx 1$  M) and assuming a doubling time of 17 h ( $\mu = 1$  d<sup>-1</sup>), less than  
998  $10^{-6}$  M DMSP is expected to be consumed by reaction with  $\bullet\text{OH}$  and  $\bullet\text{O}_2^-$ . Assuming that  
999 the total cellular pool of DMSP is kept constant due to *in vivo* DMSP production in  
1000 control cells, then the photon cost of DMSP regeneration is  $93 \times 10^{-6}$  mol absorbed  
1001 photons, i.e., less than  $10^{-2}$  % of the total photon energy cost for growth. Hence, even for  
1002 a one or two orders of magnitude increase in  $\bullet\text{OH}$  and  $\bullet\text{O}_2^-$  concentrations in cells  
1003 exposed to metal(loid)s, regeneration of DMSP by *de novo* DMSP synthesis would likely  
1004 be a minor energy expenditure. Likewise, since GBT is a less effective hydroxyl radical  
1005 scavenger than DMSP<sup>118</sup>, the cost for maintaining the intracellular pool of GBT constant  
1006 by *de novo* GBT synthesis in conditions of oxidative stress is also expected to be minor.

1007

1008

## 1009 **11. Lipophilic non-enzymatic antioxidants**

1010

1011 Intracellular concentrations of lipophilic carotenoids that specifically protect the  
1012 chloroplast apparatus from ROS generally remain constant, or decrease, in microalgae  
1013 exposed to Cd or Cu. Only in a few cases did carotenoids increase, but at growth-  
1014 inhibitory metal concentrations, suggesting that they are not on the first line of defense  
1015 against ROS in algae. Indeed, exposure of *Scenedesmus* sp. to a toxic Cu concentration

1016 (on O<sub>2</sub> evolution and cell viability) of 2.5 μM for 6 h or 7 days did not affect carotenoid  
1017 cell quotas<sup>125</sup>. Also, growth-inhibitory Cd concentrations did not affect the carotenoid  
1018 content of the diatom *Nitzschia palea*<sup>126, 127</sup>, but strongly affect antioxidant enzymes and  
1019 proline accumulation<sup>127</sup>. Likewise, chronic metal stress (0.5 mg Cd L<sup>-1</sup> for 30 days) in  
1020 the dinoflagellate *Gonyaulax polyedra* does not influence β-carotene (a carotenoid)  
1021 synthesis but increased SOD and APX activity<sup>128</sup>. It is known that a 24-h exposure to a  
1022 high total Cd concentration (20 mg L<sup>-1</sup> in reconstitute seawater with no strong metal  
1023 ligands added) inhibit epoxidation of diatoxanthin to diadinoxanthin, which are  
1024 xanthophyll classified as carotenoids, in *Phaeodactylum tricorutum*<sup>129</sup>. Furthermore,  
1025 growth-inhibitory Cd concentrations decreased carotenoid cell content in *Senedesmus*  
1026 *bijugatus*<sup>126</sup>. Only in the study of Mallick<sup>116</sup> and Bossuyt and Janssen<sup>130</sup> did the  
1027 carotenoid cell content of *Chlorella vulgaris* and *P. subcapitata* increased in response to  
1028 growth-inhibitory Cu concentrations (no evidence of carotenoid increase was found at  
1029 non-growth inhibitory Cu concentrations in both studies).

1030

1031 Regarding the effects of metal(loid)s on other lipophilic antioxidants such as tocopherols  
1032 in microalgae, to the best of our knowledge, no studies have yet been performed on this  
1033 topic.

1034

1035

1036

1037 **12. References**

1038

- 1039 1. B. J. Mifflin and P. J. Lea, *Ann. Rev. Plant Physio.*, 1977, 28, 299-329.
- 1040 2. E. H. Harris, ed., *The Chlamydomonas Sourcebook*, Academic Press, Toronto,  
1041 1989.
- 1042 3. B. G. Forde and P. J. Lea, *J. Exp. Bot.*, 2007, 58, 2339-2358.
- 1043 4. S. A. Robinson, A. P. Slade, G. G. Fox, R. Phillips, R. G. Ratcliffe and G. R.  
1044 Stewart, *Plant Physiol.*, 1991, 95, 509-516.
- 1045 5. J. V. Cullimore and A. P. Sims, *Phytochemistry*, 1981, 20, 933-940.
- 1046 6. P. J. Lea and B. J. Mifflin, *Plant Physiology and Biochemistry*, 2003, 41, 555-564.
- 1047 7. W. Ullrich, in *Nitrogen Metabolism of Plants*, ed. D. P. e. K Mengel, Clarendon  
1048 Press, Oxford, Editon edn., 1992, pp. 121-137.
- 1049 8. W. Ullrich, H.-D. Schmitt and E. Arntz, in *Biology of inorganic nitrogen and*  
1050 *sulphur*, ed. T. A. Bothe H, eds., Springer, Berlin, Heidelberg, New York, Editon edn.,  
1051 1981, pp. 244-251.
- 1052 9. R. Tischner, *Plant Cell Environ.*, 2000, 23, 1005-1024.
- 1053 10. L. Beevers and R. H. Hageman, *Ann. Rev. Plant Physio.*, 1969, 20, 495-&.
- 1054 11. M. Hodges, *J. Exp. Bot.*, 2002, 53, 905-916.
- 1055 12. J. A. Raven, J. Beardall and M. Giordano, *Photosynth. Res.*, 2014, 121, 111-124.
- 1056 13. J. A. Raven and J. Beardall, *J. Exp. Bot.*, 2015.
- 1057 14. M. Laloi, *Cell. Mol. Life Sci.*, 1999, 56, 918-944.
- 1058 15. K. Schuller, W. Plaxton and D. Turpin, *Plant Physiol.*, 1990, 93, 1303-1311.
- 1059 16. G. Vanlerberghe, K. Schuller, R. Smith, R. Feil, W. Plaxton and D. Turpin, *Plant*  
1060 *Physiol.*, 1990, 94, 284-290.
- 1061 17. B. O'Leary, J. Park and W. Plaxton, *Biochem. J.*, 2011, 436, 15-34.
- 1062 18. I. Haferkamp, *FEBS Lett.*, 2007, 581, 2375-2379.
- 1063 19. J. A. Raven and P. J. Ralph, *J. Appl. Phycol.*, 2015, 27, 1-31.



- 1064 20. T. Leustek and K. Saito, *Plant Physiol.*, 1999, 120, 637-643.
- 1065 21. J. Stefels, *J. Sea Res.*, 2000, 43, 183-197.
- 1066 22. H. E. Umbarger, *Annu. Rev. Biochem.*, 1978, 47, 533-606.
- 1067 23. A. D. Hanson and S. Roje, *Ann. Rev. Plant Physio.*, 2001, 52, 119-137.
- 1068 24. S. Ravanel, B. Gakière, D. Job and R. Douce, *Proc. Natl. Acad. Sci. USA*, 1998,  
1069 95, 7805-7812.
- 1070 25. D. Tang, M. M. Shafer, D. A. Karner and D. E. Armstrong, *Limnol. Oceanogr.*,  
1071 2005, 50, 516-525.
- 1072 26. C. L. Dupont and B. A. Ahner, *Limnol. Oceanogr.*, 2005, 50, 508-515.
- 1073 27. J. G. Lee, B. A. Ahner and F. M. M. Morel, *Environ. Sci. Technol.*, 1996, 30,  
1074 1814-1821.
- 1075 28. A. Devez, E. Achterberg and M. Gledhill, in *Metal-carbon bonds in enzymes and*  
1076 *cofactors*, eds. A. Sigel, H. Sigel and R. K. O. Sigel, Royal Society of Chemistry, Editon  
1077 edn., 2009, vol. 5, pp. 441-481.
- 1078 29. E. Heuillet, A. Moreau, S. Halpern, N. Jeanne and S. Puiseuxdao, *Biol. Cell.*,  
1079 1986, 58, 79-85.
- 1080 30. Y. Nassiri, J. Wéry, J. L. Mansot and T. Ginsburger-Vogel, *Arch. Environ*,  
1081 *Contam. Toxicol.*, 1997, 33, 156-161.
- 1082 31. C. T. Dameron, R. N. Reese, R. K. Mehra, A. R. Kortan, P. J. Carroll, M. L.  
1083 Steigerwald, L. E. Brus and D. R. Winge, *Nature*, 1989, 338, 596-597.
- 1084 32. E. Morelli, B. H. Cruz, S. Somovigo and G. Scarano, *Plant Sci.*, 2002, 163, 807-  
1085 813.
- 1086 33. M. Lavoie, S. Le Faucheur, C. Fortin and P. G. C. Campbell, *Aquat. Toxicol.*,  
1087 2009, 92, 65-75.
- 1088 34. B. A. Ahner, S. Kong and F. M. M. Morel, *Limnol. Oceanogr.*, 1995, 40, 649-  
1089 657.
- 1090 35. E. Morelli and G. Scarano, *Mar. Environ. Res.*, 2001, 52, 383-395.
- 1091 36. S. Hu, K. W. K. Lau and M. Wu, *Plant Sci.*, 2001, 161, 987-996.
- 1092 37. R. H. Juang, K. F. McCue and D. W. Ow, *Arch. Biochem. Biophys.*, 1993, 304,  
1093 392-401.

- 1094 38. D. M. Speiser, D. F. Ortiz, L. Kreppel, G. Scheel, G. McDonald and D. W. Ow,  
1095 *Mol. Cell. Biol.*, 1992, 12, 5301-5310.
- 1096 39. D. Mendoza-Cozatl, H. Loza-Tavera, A. Hernandez-Navarro and R. Moreno-  
1097 Sanchez, *FEMS Microbiol. Rev.*, 2005, 29, 653-671.
- 1098 40. B. A. Ahner and F. M. M. Morel, *Limnol. Oceanogr.*, 1995, 40, 658-665.
- 1099 41. S. Le Faucheur, F. Schildknecht, R. Behra and L. Sigg, *Aquat. Toxicol.*, 2006, 80,  
1100 355-361.
- 1101 42. J. W. Rijstenbil and J. A. Wijnholds, *Mar. Biol.*, 1996, 127, 45-54.
- 1102 43. C. D. Payne and N. M. Price, *J. Phycol.*, 1999, 35, 293-302.
- 1103 44. S. Le Faucheur, R. Behra and L. Sigg, *Environ. Toxicol. Chem.*, 2005, 24, 1731-  
1104 1737.
- 1105 45. D. Kaplan, Y. M. Heimer, A. Abeliovich and P. B. Goldsbrough, *Plant Sci.*, 1995,  
1106 109, 129-137.
- 1107 46. A. Bundy, *Can. Tech. Rep. Fish. Aquat. Sci.*, 2004, 2520, xii-19.
- 1108 47. E. Torricelli, G. Gorbi, B. Pawlik-Skowronska, L. S. Di Toppi and M. G. Corradi,  
1109 *Aquat. Toxicol.*, 2004, 68, 315-323.
- 1110 48. C. Nalewajko, *J. Fish. Res. Board Can.*, 1966, 23, 1285-&.
- 1111 49. G. Y. Rhee, *J. Phycol.*, 1973, 9, 495-506.
- 1112 50. E. Sakshaug and O. Holm-Hansen, *J. Exp. Mar. Biol. Ecol.*, 1977, 29, 1-34.
- 1113 51. A. Elgavish and G. A. Elgavish, *J. Phycol.*, 1980, 16, 368-374.
- 1114 52. O. Oku and A. Kamatani, *Mar. Biol.*, 1995, 123, 393-399.
- 1115 53. L. Karni and M. Avron, *Plant Cell Physiol.*, 1988, 29, 1311-1314.
- 1116 54. S. Miyachi and H. Tamiya, *Plant Cell Physiol.*, 1961, 2, 405-414.
- 1117 55. C. C. Chung, S. P. L. Hwang and J. Chang, *Appl. Environ. Microb.*, 2003, 69,  
1118 754-759.
- 1119 56. E. A. Laws, S. F. Pei, P. Bienfang, S. Grant and W. G. Sunda, *J. Phycol.*, 2011,  
1120 47, 1089-1097.

- 1121 57. A. D. Cembella, N. J. Antia and P. J. Harrison, *CRC Cr. Rev. Microbiol.*, 1982,  
1122 10, 317-391.
- 1123 58. Y. Shaked, Y. Xu, K. Leblanc and F. M. M. Morel, *Limnol. Oceanogr.*, 2006, 51,  
1124 299-309.
- 1125 59. D. P. Schachtman, R. J. Reid and S. M. Ayling, *Plant Physiol.*, 1998, 116, 447-  
1126 453.
- 1127 60. J. A. Raven, *Energetics and Transport in Aquatic Plants*, A. R. Liss, New York,  
1128 1984.
- 1129 61. A. Kornberg, N. N. Rao and D. Ault-Riche, *Annu. Rev. Biochem.*, 1999, 68, 89-  
1130 125.
- 1131 62. I. S. Kualev, V. Vagabov and T. Kulakovskaya, *The biochemistry of inorganic*  
1132 *polyphosphates*, Second Edition, 2005.
- 1133 63. F. Harold and R. Harold, *J. Bacteriol.*, 1965, 89, 1262-1270.
- 1134 64. C. S. Hassler and K. J. Wilkinson, *Environ. Toxicol. Chem.*, 2003, 22, 620-626.
- 1135 65. H. T. Wolterbeek, A. Viragh, J. E. Sloof, G. Bolier, B. van der Veer and J. de  
1136 Kok, *Environ. Pollut.*, 1995, 88, 85-90.
- 1137 66. O. Errécalde and P. G. C. Campbell, *J. Phycol.*, 2000, 36, 473-483.
- 1138 67. M. Lavoie, P. G. C. Campbell and C. Fortin, *Environ. Sci. Technol.*, 2014, 48,  
1139 1222-1229.
- 1140 68. B. M. S. L. Angel, C. A. A. Stauber J. L. and D. F. Jolley, *Aquat. Toxicol.*, 2015.
- 1141 69. M. Delnomdedieu, M. M. Basti, J. D. Otvos and D. J. Thomas, *Chem-Biol.*  
1142 *Interact.*, 1994, 90, 139-155.
- 1143 70. J. F. Ma, N. Yamaji, N. Mitani, X.-Y. Xu, Y.-H. Su, S. P. McGrath and F.-J.  
1144 Zhao, *Proc. Natl. Acad. Sci. USA*, 2008, 105, 9931-9935.
- 1145 71. J. Qin, C. R. Lehr, C. G. Yuan, X. C. Le, T. R. McDermott and B. P. Rosen, *Proc.*  
1146 *Natl. Acad. Sci. USA*, 2009, 106, 5213-5217.
- 1147 72. M. F. Hughes, *Toxicol. Lett.*, 2002, 133, 1-16.
- 1148 73. K. Knauer and H. Hemond, *J. Phycol.*, 2000, 36, 506-509.
- 1149 74. S. Maeda, S. Nakashima, T. Takeshita and S. Higashi, *Separ. Sci. Technol.*, 1985,  
1150 20, 153-161.

- 1151 75. I. B. Karadjova, V. I. Slaveykova and D. L. Tsalev, *Aquat. Toxicol.*, 2008, 87,  
1152 264-271.
- 1153 76. J. Zeilinger, University of Vienna, 2011.
- 1154 77. J. L. Levy, J. L. Stauber, M. S. Adams, W. A. Maher, J. K. Kirby and D. F. Jolley,  
1155 *Environ. Toxicol. Chem.*, 2005, 24, 2630-2639.
- 1156 78. I. Olenina, S. Hajdu, L. Edler, A. Andersson, N. Wasmund, S. Busch, J. Göbel, S.  
1157 Gromisz, S. Huseby, M. Huttunen, A. Jaanus, P. Kokkonen, I. Ledaine and E.  
1158 Niemkiewicz, *Biovolumes and size-classes of phytoplankton in the Baltic Sea*, Sea  
1159 Environmental Proceeding. Helsinki Commission Baltic Marine Environment Protection  
1160 Commission, 2006.
- 1161 79. B. Pawlik-Skowronska, J. Pirszel, R. Kalinowska and T. Skowronski, *Aquat.*  
1162 *Toxicol.*, 2004, 70, 201-212.
- 1163 80. N.-X. Wang, Y. Li, X.-H. Deng, A.-J. Miao, R. Ji and L.-Y. Yang, *Water Res.*,  
1164 2013, 47, 2497-2506.
- 1165 81. M. A. Rahman and C. Hassler, *Aquat. Toxicol.*, 2014, 146, 212-219.
- 1166 82. H. Hasegawa, Y. Sohrin, K. Seki, M. Sato, K. Norisuye, K. Naito and M. Matsui,  
1167 *Chemosphere*, 2001, 43, 265-272.
- 1168 83. R. P. Mason, F. M. M. Morel and H. F. Hemond, *Water Air Soil Poll.*, 1995, 80,  
1169 775-787.
- 1170 84. S. Devars, C. Aviles, C. Cervantes and R. Moreno-Sanchez, *Arch. Microbiol.*,  
1171 2000, 174, 175-180.
- 1172 85. E. Morelli, R. Ferrara, B. Bellini, F. Dini, G. Di Giuseppe and L. Fantozzi, *Sci.*  
1173 *Total Environ.*, 2009, 408, 286-293.
- 1174 86. Y. Wu and W. X. Wang, *Aquat. Toxicol.*, 2014, 148, 122-129.
- 1175 87. G. J. Jones, B. P. Palenik and F. M. M. Morel, *J. Phycol.*, 1987, 23, 237-244.
- 1176 88. K. L. Hill, R. Hassett, D. Kosman and S. Merchant, *Plant Physiol.*, 1996, 112,  
1177 697-704.
- 1178 89. A. B. Kustka, A. E. Allen and F. M. M. Morel, *J. Phycol.*, 2007, 43, 715-729.
- 1179 90. K. P. Shatwell, A. Dancis, A. R. Cross, R. D. Klausner and A. W. Segal, *J. Biol.*  
1180 *Chem.*, 1996, 271, 14240-14244.

- 1181 91. B. Colman and K. D. Balkos, *Can. J. Bot.*, 2005, 83, 865-871.
- 1182 92. T. E. Shehata and E. S. Kempner, *Appl. Environ. Microb.*, 1977, 33, 874-877.
- 1183 93. W. G. Sunda and S. A. Huntsman, *Limnol. Oceanogr.*, 1992, 37, 25-40.
- 1184 94. S. Le Faucheur, P. G. C. Campbell, C. Fortin and V. Slaveykova, *Environ.*  
1185 *Toxicol. Chem.*, 2014, 33, 1211-1224.
- 1186 95. T. Y. Ho, A. Quigg, Z. V. Finkel, A. J. Milligan, K. Wyman, P. G. Falkowski and  
1187 F. M. M. Morel, *J. Phycol.*, 2003, 39, 1145-1159.
- 1188 96. P. A. Thompson, P. J. Harrison and J. S. Parslow, *J. Phycol.*, 1991, 27, 351-360.
- 1189 97. A. Sirikhachornkit and K. K. Niyogi, in *Chloroplast: Basics and Applications*,  
1190 eds. C. A. Rebeiz, C. Benning, H. J. Bohnert, H. Daniell, J. K. Hooper, H. K.  
1191 Lichtenthaler, A. R. Portis and B. C. Tripathy, Editon edn., 2010, vol. 31, pp. 379-396.
- 1192 98. H. V. Perales-Vela, J. M. Pena-Castro and R. O. Canizares-Villanueva,  
1193 *Chemosphere*, 2006, 64, 1-10.
- 1194 99. T. L. Stoiber, M. M. Shafer and D. E. Armstrong, *Environ. Toxicol. Chem.*, 2010,  
1195 29, 191-200.
- 1196 100. T. L. Stoiber, M. M. Shafer and D. E. Armstrong, *Environ. Toxicol. Chem.*, 2012,  
1197 31, 324-335.
- 1198 101. M. Lavoie, C. Fortin and P. G. C. Campbell, *Environ. Toxicol. Chem.*, 2012, 31,  
1199 1445-1452.
- 1200 102. K. Apel and H. Hirt, *Ann. Rev. Plant. Biol.*, 2004.
- 1201 103. W. Sunda, D. Kieber, R. Kiene and S. Huntsman, *Nature*, 2002, 418, 317-320.
- 1202 104. A. Boveris and E. Cadenas, in *Oxygen, Gene Expression, and Cellular Function*,  
1203 ed. L. B. C. a. D. J. Massaro, Marcel Dekker, New York, Editon edn., 1997, pp. 1-88.
- 1204 105. J. A. Raven, *Funct. Ecol.*, 1995, 9, 701-707.
- 1205 106. E. I. Urzica, L. N. Adler, M. D. Page, C. L. Linster, M. A. Arbing, D. Casero, M.  
1206 Pellegrini, S. S. Merchant and S. G. Clarke, *J. Biol. Chem.*, 2012, 287, 14234-14245.
- 1207 107. R. A. Craigie and T. Cavalier-Smith, *J. Cell Sci.*, 1982, 54, 173-191.
- 1208 108. L. Szabados and A. Savoure, *Trends Plant Sci.*, 2010, 15, 89-97.
- 1209 109. J. T. Wu, S. J. Chang and T. L. Chou, *Bot. Bull. Acad. Sinica*, 1995, 36, 89-93.

- 1210 110. S. K. Mehta and J. P. Gaur, *New Phytol.*, 1999, 143, 253-259.
- 1211 111. B. N. Tripathi and J. P. Gaur, *Planta*, 2004, 219, 397-404.
- 1212 112. A. Elbaz, Y. Y. Wei, Q. A. Meng, Q. Zheng and Z. M. Yang, *Ecotoxicology*,  
1213 2010, 19, 1285-1293.
- 1214 113. O. Rocha and A. Duncan, *J. Plankton Res.*, 1985, 7, 279-294.
- 1215 114. D. M. J. Dickson and G. O. Kirst, *New Phytol.*, 1987, 106, 645-655.
- 1216 115. D. M. J. Dickson and G. O. Kirst, *New Phytol.*, 1987, 106, 657-666.
- 1217 116. N. Mallick, *J. Plant Physiol.*, 2004, 161, 591-597.
- 1218 117. A. Spielmeier, B. Gebser and G. Pohnert, *Mar. Chem.*, 2011, 124, 48-86.
- 1219 118. J. A. Raven and A. M. Waite, *New Phytol.*, 2004, 162, 45-61.
- 1220 119. J. Stefels, M. Steinke, S. Turner, G. Malin and S. Belviso, *Biogeochemistry*, 2007,  
1221 83, 245-275.
- 1222 120. M. Lavoie, M. Levasseur and W. G. Sunda, *Environ. Chem.*, 2015.
- 1223 121. A. M. N. Caruana and G. Malin, *Prog. Oceanogr.*, 2014.
- 1224 122. M. Lavoie, J. A. Raven and M. Levasseur, *J. Phycol.*, 2016, 52, 239-251.
- 1225 123. K. Mopper, D. J. Kieber and A. Stubbins, in *Biogeochemistry of marine dissolved*  
1226 *organic matter*, eds. D. A. Hansell and C. A. Carlson, Academic Press, Editon edn.,  
1227 2015.
- 1228 124. A. Polle, *Plant Physiol.*, 2001, 126, 445-462.
- 1229 125. B. N. Tripathi, S. K. Mehta, A. Amar and J. P. Gaur, *Chemosphere*, 2006, 62,  
1230 538-544.
- 1231 126. K. S. Sathya and K. P. Balakrishnan, *Water Air Soil Poll.*, 1988, 38, 283-297.
- 1232 127. D. Branco, A. Lima, S. F. P. Almeida and E. Figueira, *Aquat. Toxicol.*, 2010, 99,  
1233 109-117.
- 1234 128. O. K. Okamoto, D. L. Robertson, T. F. Fagan, J. W. Hastings and P. Colepicolo,  
1235 *J. Biol. Chem.*, 2001, 276, 19989-19993.
- 1236 129. M. Bertrand, B. Schoefs, P. Siffel, K. Rohacek and I. Molnar, *FEBS Lett.*, 2001,  
1237 508, 153-156.

1238 130. B. T. A. Bossuyt and C. R. Janssen, *Aquat. Toxicol.*, 2004, 68, 61-74.

1239

1240
